# Supplementary material
Source: bioRxiv or medRxiv preprint supplement (https://www.biorxiv.org/highwire/filestream/123371/field_highwire_adjunct_files/0/408351-1.pdf)
Supplement: Supplementary file [file 408351-1.pdf]

1 **The essential genome of the crenarchaeal model *Sulfolobus islandicus***

2  
3 Changyi Zhang<sup>1, 2#</sup>, Alex P. R. Phillips<sup>1, 2#</sup>, Rebecca L. Wipfler<sup>1</sup>, Gary J. Olsen<sup>1, 2</sup> and Rachel J.  
4 Whitaker<sup>1, 2\*</sup>

5 <sup>1</sup> Carl R. Woese Institute for Genomic Biology, University of Illinois at Urbana-Champaign,  
6 Urbana, Illinois, USA

7 <sup>2</sup> Department of Microbiology, University of Illinois at Urbana-Champaign, Urbana, Illinois,  
8 USA

9 # C.Z. and A.P.R.P contributed equally to this work

10 \*Correspondence: Rachel J. Whitaker. E-mail: [rwhitaker@life.illinois.edu](mailto:rwhitaker@life.illinois.edu)

11  
12  
13  
14  
15  
16  
17  
18  
19  
20  
21  
22  
23  
24  
25  
26  
27  
28  
29  
30  
31  
32  
33  
34  
35  
36  
37  
38  
39  
40  
41  
42  
43  
44  
45  
46

47 **Supplementary results and discussion**

48

49 Here we provide additional descriptions and discussion of essential genes in several arCOG  
50 functional categories from the perspective of gene function, and highlight a few non-essential  
51 genes that possibly play critical roles in *Sulfolobus* species.

52

53 **DNA replication, repair, and recombination**

54 Tn-seq analysis allowed us to identify 23 essential genes involved in DNA replication, repair,  
55 and recombination (arCOG functional category [L]) in *S. islandicus*, among which 14 genes  
56 encode core components of archaeal DNA replication machinery. The MCM (mini-  
57 chromosome maintenance complex), one of the indispensable ancillary complexes during DNA  
58 replication in Archaea and Eukaryotes, is the replicative helicase for DNA unwinding,  
59 performing the function of DnaB in Bacteria. In contrast to the two hyperthermophilic  
60 euryarchaea *Methanococcus maripaludis* and *Thermococcus kodakarensis*, which possess  
61 multiple *mcm* genes with only one copy required<sup>1-3</sup>, *Sulfolobus* species contain only one MCM,  
62 forming a homohexameric architecture<sup>4</sup>. Given the indispensable roles of MCM for DNA  
63 unwinding during DNA replication, the existence of the sole *mcm* gene in *S. islandicus* explains  
64 why the inactivation (via transposon insertion or gene knockout strategy) of *mcm* is lethal.  
65 Notably, the essentiality of the single *mcm* gene was also demonstrated in a halophilic archaeon,  
66 *Halobacterium* sp. NRC-1<sup>5</sup>. Another two genes involved in the initiation of DNA replication  
67 encode GINS homologs Gins23 and Gins15, both of which are essential in *S. islandicus* M.16.4.  
68 Additionally, the archaeal ortholog of Cdc45, which was shown to form a stable complex with  
69 GINS to stimulate MCM helicase activity in *S. solfataricus*<sup>6</sup>, was essential in our study. The  
70 essentiality of *gins*, *mcm*, and *cdc45* further supports a view demonstrating the formation of  
71 CMG complex is required for DNA replication in *Sulfolobus*<sup>6</sup>. Intriguingly, recent genetic  
72 studies in the hyperthermophilic euryarchaeon *T. kodakarensis* revealed the Cdc45/RecJ-like  
73 protein encoding gene *gan* was not essential for cell viability<sup>7,8</sup>, indicating the function of CMG  
74 complex presumably diverged in archaea.

75

76 PCNA (Proliferating cell nuclear antigen) belonging to the family of DNA sliding clamps is  
77 structurally and functionally conserved<sup>9,10</sup>. Unlike Euryarchaeota, which generally contain one  
78 PCNA gene (with the exception of *T. kodakarensis* in which two PCNA homologs were  
79 found<sup>11,12</sup>), Crenarchaeota possess three distinct PCNA subunits. All three subunits were  
80 essential in *S. islandicus* M.16.4 inferred by Tn-seq data, consistent with a previous genetic  
81 analysis in another *S. islandicus* strain Rey15A<sup>13</sup>. These results explain why three PCNA  
82 subunits formed a heterotrimer rather than distinct homotrimers to act as the sliding clamp  
83 during DNA replication in other *Sulfolobus* species<sup>14</sup>. The two subunits of replication factor C



84 (RFC<sub>S</sub> and RFC<sub>L</sub>), acting as the loader of the DNA sliding clamp, are found in all three domains  
85 and are essential in *S. islandicus* M.16.4 as well as the euryarchaeon *M. maripaludis*<sup>1</sup>.

86

87 One of the unique features of Archaea is that they exclusively encode both bacterial-type  
88 (DnaG) and eukaryotic-type primase, with the later type consisting of a small subunit (catalytic  
89 subunit, PriS) and a large subunit (noncatalytic subunit, PriL). The function of DnaG and  
90 heterodimer PriLS have been previously biochemically characterized in *S. solfataricus*<sup>15,16</sup>.  
91 Strikingly, a novel primase PriX was recently identified and shown to significantly promote the  
92 primer synthesis *in vitro* by forming a heterotrimer with PriSL in *S. solfataricus*<sup>17</sup>. Here we  
93 revealed *dnaG* in *S. islandicus* (M164\_2048) was essential, in contrast to the non-essentiality  
94 of *dnaG* in the euryarchaea *M. Maripaludis* and *Haloferax volcanii*<sup>1,16</sup>. Tn-seq data showed  
95 *priS* (M164\_1162) was essential whereas *priL* (M164\_1568) and *priX* (M164\_1652) were  
96 classified as “unassigned”. Moreover, we were unable to obtain knockouts for *priL* and *priX*  
97 even if we prolonged the incubation of transformation plates for 20 days, indicating they are  
98 required for cell survival in *S. islandicus* M.16.4. There are another two “unassigned” genes  
99 related to DNA maturation: *lig*, encoding an ATP-dependent DNA ligase<sup>18</sup>, and *rnhIII*, encoding  
100 a ribonuclease HII that was shown *in vitro* to exhibit the cleavage activity of RNA in hybrid  
101 RNA/DNA substrates in *S. tokodaii*<sup>19</sup>. All attempts to delete *lig* or *rnhIII* were unsuccessful,  
102 confirming that they are required for the primer removal during the maturation of Okazaki  
103 fragments in *Sulfolobus* DNA replication. Notably, this result argues against genetic studies  
104 performed in the hyperthermophilic euryarchaeon *T. kodakarensis* in which the function of  
105 RNase HII can be replaced by the Fen1 or GAN (GINS-associated nuclease)<sup>7</sup>.

106

107 *Sulfolobus* species encode three B-family DNA polymerases and one Y-family DNA  
108 polymerase<sup>20</sup>. However, only *dpoB1* (M164\_1573) is essential whereas *dpoB2* (M164\_0814),  
109 *dpoB3* (M164\_2047), and *dpo4* (M164\_0255) are classified as non-essential via Tn-seq  
110 analysis. To validate these results, direct gene disruptions were attempted by using the *argD*  
111 marker cassette to replace the *dpoB1*, *dpoB2*, *dpoB3*, and *dpo4* in the chromosome.  
112 Consequently, individual disruption mutants of *dpoB2*, *dpoB3*, and *dpo4* could be successfully  
113 obtained (Supplementary Fig. 10b); however, disruption of *dpoB1* failed after repeated  
114 attempts. These studies suggest DpoB1 is an authentic replicative DNA polymerase *in vivo* for  
115 *Sulfolobus*, although *in vitro* studies showed DpoB2 and DpoB3 possessed very low DNA  
116 polymerase and 3' to 5' exonuclease activities<sup>21</sup>, consistent with phylogenetic analyses  
117 suggesting the B-family DNA polymerases evolved by gene duplication events in  
118 Crenarchaeota<sup>22,23</sup>. *S. islandicus* M.16.4 encodes PolB1-binding proteins PBP1 (M164\_1996;  
119 arCOG functional category [S]) and PBP2 (M164\_1545; arCOG functional category [K]), the

120 orthologues of which have been recently identified to form a heterotrimeric DNA polymerase  
121 holoenzyme together with DpoB1 in a related species *S. solfataricus*<sup>24</sup>. Both Tn-seq and gene  
122 knockout analyses showed that *pbp2* was essential whereas *pbp1* was not (Supplementary Fig.  
123 10c), indicating the formation of heterotrimeric DNA polymerase holoenzyme was not  
124 necessary *in vivo*, at least for the maintenance of cell growth in *S. islandicus*. Remarkably, with  
125 the exception of the two newly isolated thermophilic ammonia-oxidizing thaumarchaea  
126 *Candidatus Nitrosocaldus cavascurensis* and *Candidatus Nitrosocaldus islandicus*<sup>25,26</sup>, which  
127 lack archaeal specific D-family DNA polymerase, both B- and D-family DNA polymerases are  
128 present in all other members of Thaumarchaeota lineage as well as Euryarchaeota,  
129 Korarchaeota, Aigarchaeota, and Nanoarchaeota lineages. Moreover, genetic studies in both *T.*  
130 *kodakarensis* and *M. maripaludis* revealed Pol D was possibly the major DNA replicative  
131 polymerase because *dpoB* was non-essential *in vivo*<sup>1,27</sup>. While Crenarchaeota and Eukaryota  
132 both use B-family polymerases to replicate their genomes, which can be interpreted as evidence  
133 for their shared ancestry, a recent review of the archaeal tree of life suggested that loss of Pol  
134 D instead occurred twice independently in the two lineages<sup>28</sup>. Other essential genes in arCOG  
135 functional category [L] included *rpa* (M164\_0180), *top6A* (M164\_1238), *top6B* (M164\_1239),  
136 and *cren7* (M164\_1232) encoding a highly conserved chromatin protein in Crenarchaeota<sup>29</sup>.  
137 The 5' flap endonuclease (M164\_1965, FEN1) that strongly interacts with PCNA<sup>14</sup> is  
138 essential, whereas in Euryarchaeota it was previously shown that *fen1* could be disrupted or  
139 deleted<sup>1,7</sup>.

140

141 DNA damage repair in *Sulfolobus* species remained largely elusive and most of the predicted  
142 candidates related to DNA repair are non-essential (Supplementary Table 3). In particular, the  
143 canonical DNA mismatch repair pathway has not been found in *Sulfolobus* species so far.  
144 Recently, Ishino *et al.* reported that a mismatch-specific endonuclease (EndoMS) in *T.*  
145 *kodakarensis* could specifically cleave dsDNA substrates with mismatched bases  
146 incorporated<sup>30</sup>. The EndoMS was found to be present in some bacteria particularly in  
147 Actinobacteria, and distributed in archaeal members belonging to the TACK superphylum,  
148 Euryarchaeota, and ASGARD phylum<sup>31,32</sup>. Here we showed that the *S. islandicus* EndoMS  
149 homolog (M164\_0025; annotated as NucS), existing in all sequenced *Sulfolobus* species, was  
150 non-essential by both Tn-seq and gene knockout experiments (Supplementary Fig. 3b).  
151 Investigation of the spontaneous mutation rates and mutation spectra in wild-type and *endoMS*  
152 mutant strains with a forward mutation assay will be required to identify whether the *Sulfolobus*  
153 EndoMS homolog plays a functional role in the mutation avoidance, as recently reported in  
154 *Mycobacterium tuberculosis*<sup>32</sup> and *Corynebacterium glutamicum*<sup>33</sup>. The *udg4* (M164\_0085),  
155 encoding uracil-DNA glycosylase, was classified as “unassigned” by Tn-seq assay. We  
156 speculate the *udg4* mutant colonies generated by the insertion of transposon were not

157 successfully captured on plates within 10 days of incubation, which was supported by the  
158 observation of the *udg4* knockout mutant exhibiting a greatly reduced cell viability in  
159 comparison to the wild type strain (Supplementary Fig. 2b). Four genes *nurA* (*M164\_0062*),  
160 *rad50* (*M164\_0063*), *mre11* (*M164\_0064*), and *herA* (*M164\_0065*), relevant to double-strand  
161 DNA break repair (DSB), were essential in *S. islandicus* M.16.4 as revealed by Tn-seq data,  
162 consistent with previous genetic analyses in *S. islandicus* Rey15A and *T. kodakarensis*<sup>34,35</sup>. The  
163 gene that encodes RadA (*M164\_1897*), the archaeal ortholog of RecA/Rad51 family  
164 recombinase, was essential in our study. Genetic analysis of *radA* in *S. islandicus* Rey15A and  
165 *T. kodakarensis* showed that mutation of this gene was lethal<sup>34,35</sup>, whereas the *H. volcanii* strain  
166 lacking *radA* was viable but defective in homologous recombination<sup>36</sup>. More interestingly, it  
167 has been shown recently that *radA* was required for the cell survival of *H. volcanii* that lacked  
168 all four replication origins<sup>37</sup>. In contrast to hyperthermophilic archaea, *radA*, *rad50*, and *mre11*  
169 individual deletion mutants have been successfully generated in mesophilic archaea  
170 *Halobacterium salinarum* or *H. volcanii*<sup>36,38-40</sup>. The apparent essentiality of HR-related genes  
171 in hyperthermophilic archaea suggested that they presumably harbor a unique mechanism,  
172 which is different from that of mesophilic archaea, in order to adapt to their harsh environments,  
173 particularly elevated temperatures<sup>41</sup>.

174

## 175 **Transcription**

176 Tn-seq analysis predicted that 11 among 13 RNAP subunits in *S. islandicus* M.16.4 were  
177 essential. The Archaea-specific Rpo13 (*M164\_1754*), a RNAP–DNA stabilization factor<sup>42</sup>, was  
178 identified as non-essential by Tn-seq analysis and successful construction of a *rpo13* disruption  
179 mutant (Supplementary Fig. 3b). The RNAP subunit Rpo8 (*M164\_1872*) found in many  
180 eukaryotes and highly conserved in Crenarchaeota and Korarchaeota<sup>43</sup>, was categorized as  
181 “unassigned” ( $\log_2FC=-3.77$  and  $EI=2$ ). Further genetic analysis revealed the disruption of *rpo8*  
182 was not lethal (Supplementary Fig. 3b); however, growth of the *rpo8* disruption mutant was  
183 significantly impaired compared with that of the wild type strain (Supplementary Fig. 2c). The  
184 dispensability of Rpo8 or Rpo13 suggests a complete RNAP, consisting of 13 subunits<sup>42,44</sup>, is  
185 not required to maintain cell survival *in vivo* for *Sulfolobus*, at least in *S. islandicus* M.16.4.

186

187 Like that of eukaryotes, transcription initiation in Archaea required the TATA-box binding  
188 protein (TBP) and transcription factor B (TFB) bound to DNA for promoter-dependent  
189 transcription. Both Tn-seq and knockout analyses confirmed that the TBP-encoding gene  
190 (*M164\_1259*) was essential whereas the TBP-interacting protein TIP49<sup>45</sup> encoded by  
191 *M164\_0257* was non-essential in *S. islandicus* (Supplementary Table 3 and Supplementary Fig.  
192 3b). Three TFB paralogues, encoded by *tfb1* (*M164\_1706*), *tfb2* (*M164\_1265*), and *tfb3*  
193 (*M164\_1868*) respectively, were found in the genome of *S. islandicus* M.16.4. The genes *tfb1*

194 and *tfb2* were essential whereas *tfb3* was not, which were confirmed by both Tn-seq and  
195 knockout analyses (Supplementary Fig. 3b). In agreement with our discoveries, similar results  
196 regarding the essentiality/non-essentiality of these three TFB paralogs have also been observed  
197 in *S. acidocaldarius* via gene disruption analyses<sup>46</sup>. The TFB1 has been identified *in vitro* as  
198 one of three indispensable factors to direct accurate transcription in *S. shibatae*<sup>47</sup>, whereas the  
199 TFB2 was proposed to be involved in the regulation of cell cycle in *S. acidocaldarius*<sup>48</sup>.  
200 Additionally, *tfb3* was found to be highly transcribed after UV treatment in *S. solfataricus* and  
201 *S. acidocaldarius*<sup>49,50</sup>. Strikingly, it has been shown recently that *tfb3* could regulate the  
202 expression of genes involved in cellular aggregation and DNA transfer when the cells were  
203 subjected to NQO (4-nitroquinoline 1-oxide) or UV- induced DNA damage<sup>51,52</sup>.

204

205 An additional transcription factor IIE- $\alpha$  (renamed as TFE $\alpha$ , M164\_1881) was annotated in the  
206 genome of *S. islandicus* M.16.4 and was revealed to be essential by Tn-seq and gene knockout  
207 analyses. Notably, the archaeal counterpart of TFIIE $\beta$  (renamed as TFE $\beta$ ) has been functionally  
208 characterized in *S. solfataricus* recently<sup>53</sup>, and the TFE $\beta$  homolog in *S. islandicus* (M164\_1266)  
209 was shown to be essential in our study, consistent with the genetic analysis performed in *S.*  
210 *acidocaldarius*<sup>53</sup>. Four genes *spt4* (M164\_1736), *nusG* (M164\_1807), *nusA* (M164\_1922), and  
211 *nusA*-like (M164\_1973), which are proposed to be involved in the transcription elongation,  
212 were essential. Strikingly, M164\_1885, coding for an orthologue of the  
213 eukaryotic transcriptional elongation factor Elf1 found in all Crenarchaeota<sup>54</sup>, was non-  
214 essential. Functional characterization of the *elf1* deletion mutant in *S. islandicus* will help us to  
215 understand the roles of *elf1* in archaeal transcription. Four paralogues of putative transcript  
216 cleavage factor (TFS1, TFS2, TFS3, and TFS4) were found in the genome of *S. solfataricus*  
217 and *S. islandicus*<sup>55</sup>, among which *tfs1* (M164\_1859), *tfs3* (M164\_1858), and *tfs4* (M164\_0715)  
218 were predicted to be non-essential by Tn-seq analysis. This prediction was confirmed via  
219 successful obtainment of individual knockout mutants in standard growth conditions  
220 (Supplementary Fig. 3b). The fourth *tfs2* (M164\_1524), highly conserved in all Crenarchaeota,  
221 was classified as “unassigned” by Tn-seq analysis; however, it was later confirmed to be  
222 essential by means of knockout analysis, suggesting TFS2 plays more crucial functions in  
223 comparison to the other three TFS paralogs.

224

225 Unlike the euryarchaeon *H. volcanii* in which only a single SmAP is encoded<sup>56</sup>, crenarchaea  
226 contain three SmAP paralogues (hereafter named as SmAP1, SmAP2, and SmAP3) annotated  
227 as “small nuclear ribonucleoprotein (snRNP) homolog”<sup>57</sup>. Tn-seq analysis revealed *smAP1*  
228 (M164\_1376) and *smAP2* (M164\_1942) were essential whereas *smAP3* (M164\_1873) was non-

229 essential. The essentiality of both *smAP1* and *smAP2* genes could be possibly explained by a  
230 previous study, which demonstrated that SmAP1/SmAP2 strongly interacted with each other  
231 and co-purified with essential components involved in exosome, RNA modification, turnover,  
232 and translation<sup>58</sup>. In eukaryotes, the biogenesis of spliceosomal snRNP proteins required  
233 involvement of the SMN protein that interacted with an evolutionarily conserved zinc finger  
234 protein ZPR1<sup>59</sup>. Targeted disruption studies of *zpr1* indicated that it was essential for cell  
235 viability<sup>60</sup>, and played important roles in transcription and cell cycle<sup>61</sup>. *M164\_0237*, encoding  
236 a homolog of ZPR1, was an essential gene candidate in our Tn-seq assay, but its assignment  
237 was inconclusive in *M. maripaludis*<sup>1</sup>. Although categorized as “general functional prediction  
238 only” in the arCOG functional database, it is tempting to speculate ZPR1 plays a similar role  
239 in Crenarchaeota. The remaining essential genes in this functional category were mostly  
240 annotated as transcription regulators with unknown specific functions.

241

## 242 **Translation**

243 Tn-seq analysis revealed that 113 were essential among 200 genes in arCOG functional  
244 category [J]), mostly composed of ribosomal proteins, aminoacyl-tRNA synthetases (aaRSs),  
245 and translation initiation/elongation factors. Ribosomal proteins in *S. islandicus* M.16.4 are  
246 composed of 37 large- and 28 small subunits, among which 27 large-subunit encoding genes  
247 and 20 small-subunit encoding genes were essential. Two small-subunit ribosomal proteins  
248 M164\_1730 and M164\_1557, homologs of the archaeon-eukaryote S25e and S26e,  
249 respectively, were non-essential in *S. islandicus* M.16.4. The third, *M164\_1159*, encoding the  
250 small-subunit ribosomal protein S27e, was non-essential though it is widely distributed in the  
251 archaeal domain.

252

253 Genomic analysis revealed 21 aaRS-related genes were present in *S. islandicus* M.16.4, among  
254 which 18 genes were essential. Two genes, *M164\_0290* (hereafter named as *thrS1*) and  
255 *M164\_1768* (hereafter named as *thrS2*), encode ThrRS in *S. islandicus* M.16.4. The *thrS1* was  
256 classified as “unassigned” whereas *thrS2* was non-essential. Further genetic analysis showed  
257 that *thrS1* could not be knocked out; however, the *thrS2* disruption mutant could be readily  
258 generated (Supplementary Fig. 3b), suggesting that *thrS1* plays a crucial function in protein  
259 synthesis. Two genes (*M164\_1539* and *M164\_1649*; named as *leuS1* and *leuS2* respectively)  
260 encoding LeuRS were annotated in *S. islandicus* M.16.4; however, only *leuS1* was required for  
261 cell survival, leaving the function of *leuS2* unknown. Notably, the two freestanding homologues  
262 of AlaRS editing domain, AlaX1 (M164\_1702) and AlaX2 (M164\_0462), shown to hydrolyze  
263 misacylated tRNA<sup>Ala</sup> in *S. solfataricus*<sup>62</sup>, were non-essential in *S. islandicus* M.16.4. This  
264 finding was further confirmed by genetic analysis (Supplementary Fig. 3b), indicating that they

265 have overlapped functions or play less fundamental roles. *S. islandicus* M.16.4 possesses all  
266 aaRSs required for synthesizing each aminoacyl-tRNA except for GlnRS and AsnRS, which  
267 are used to directly attach Gln and Asn respectively to their cognate tRNAs. These observations  
268 indicate that aminoacyl-tRNA amidotransferase (Adt) is required for the synthesis of Gln-tRNA  
269 and Asn-tRNA. Comparative genomic analysis showed that *S. islandicus* M.16.4 contained two  
270 types of Adt, which are supposed to correct the misacylated Glu-tRNA<sup>Gln</sup> and/or Asp-tRNA<sup>Asn</sup>  
271 in the indirect pathway of Gln-tRNA<sup>Gln</sup> and or/ Asn-tRNA<sup>Asn</sup>. The first Adt (Asp/Glu-Adt),  
272 existing in most bacteria and some archaea and capable of synthesizing both Asn-tRNA and  
273 Gln-tRNA<sup>63</sup>, is supposed to function as a heterotrimeric enzyme (GatCAB) similarly in *S.*  
274 *islandicus* M.16.4. Though three GatA paralogues (named as GatA-1, 2, and 3) are present,  
275 only *gatA-1* (*M164\_1253*) is essential, suggesting that *gatA-2* (*M164\_0374*) or *gatA-3*  
276 (*M164\_1369*) is functionally redundant. The other two subunits (GatB and GatC) of GatCAB  
277 encoded by *M164\_1911* and *M164\_1252* respectively were essential as revealed by Tn-seq  
278 analysis. Additionally, *S. islandicus* M.16.4 possesses a heterodimeric amidotransferase  
279 (GatDE) for Gln-tRNA<sup>Gln</sup> formation, which has been biochemically characterized in  
280 *Methanothermobacter thermautotrophicus* and predicted to be exclusively Archaea-  
281 specific<sup>64,65</sup>. The GatD and GatE subunits, encoded by two adjacent genes *M164\_1273*  
282 (annotated as *ansB* and assigned into arCOG functional category [E]) and *M164\_1274*,  
283 respectively, were essential in *S. islandicus* M.16.4. The existence and essentiality of both  
284 GatCAB and GatDE in *S. islandicus* suggest these two complexes play distinct functions in  
285 protein synthesis.

286

287 All 13 genes involved in the cycle of translation were essential in *S. islandicus* M.16.4. These  
288 include 9 translation initiation factors: aIF-1A (*M164\_0191*), aIF-2 (*M164\_1916*), a/eIF2 $\alpha$   
289 (*M164\_1158*), a/eIF2 $\beta$  (*M164\_0194*), a/eIF2 $\gamma$  (*M164\_1739*), aSUI1 (*M164\_1707*), aIF5A  
290 (*M164\_1237*), aIF-6 (*M164\_1802*), and RLI1 (*M164\_1861*), 3 translation elongation factors:  
291 EF-1 $\alpha$  (*M164\_1926*), EF-1 $\beta$  (*M164\_1968*), and EF-2/EF-G (*M164\_1407*), and one translation  
292 termination factor aRF1 (*M164\_0157*). Notably, Sulfolobales do not contain the  
293 selenocysteine-specific translation elongation factor (SelB) which extensively exists in  
294 *Methanococcales*<sup>66</sup> and was shown to be essential previously in *M. maripaludis*<sup>1</sup>. Instead, a  
295 SelB-like protein (SelBL) is present in *S. islandicus* M.16.4 (*M164\_1681*) and found to be  
296 widely distributed in diverse archaea<sup>66</sup>. The function of SelBL remains elusive; however, both  
297 Tn-seq and genetic analyses (Supplementary Fig. 3b) showed that *selBL* was non-essential,  
298 suggesting it plays less fundamental roles in *Sulfolobus* translation.

299

300 **Cell cycle, cell division, and chromosome segregations**

301 In the arCOG functional category [D], six genes were essential inferred by Tn-seq data,  
302 including the *cdvA* (M164\_1293), *cdvB* (M164\_1294; also named as *escrt-III*), and *cdvC*  
303 (M164\_1295; also named as *vps4*), which have been proved to be the crucial components of  
304 ESCRT (Endosomal Sorting Complex Required for Transport)-III-based cell division  
305 apparatus in *Sulfolobus*<sup>67,68</sup>. Furthermore, repeated attempts to knock out individual *cdvA*, *cdvB*,  
306 and *cdvC* genes in *S. islandicus* M.16.4 failed to generate any transformants in standard growth  
307 conditions, further confirming the essentiality of the ESCRT-III system for *Sulfolobus* cell  
308 survival. Additionally, like *S. acidocaldarius* and *S. solfataricus* P2, *S. islandicus* M.16.4  
309 contains three *cdvB* paralogs: *cdvB1* (M164\_1700), *cdvB2* (M164\_1319), and *cdvB3*  
310 (M164\_1510). Interestingly, the essentiality and function of these three CdvB paralogs seemed  
311 to be divergent in *S. acidocaldarius* and *S. islandicus*. Genetic analyses of *cdvB* paralogous  
312 genes in *S. acidocaldarius* indicated that none was essential for cell viability though a  
313 significant growth defect and impaired cell division were observed in the *cdvB3* mutant<sup>69</sup>. By  
314 contrast, a recent genetic study in *S. islandicus* REY15A showed growth between the *cdvB3*  
315 deletion mutant and parental strain was indistinguishable, and CdvB3 actually played a role in  
316 virus budding rather than cell division<sup>70</sup>. It should be noted that the *cdvB3* in our Tn-seq analysis  
317 is possibly an example of false positive essential gene calling, because we can readily obtain  
318 the *cdvB3* disruption mutant in standard laboratory conditions (Supplementary Fig. 3b) with a  
319 recently developed microhomology-mediated gene inactivation system<sup>71</sup>. Our Tn-seq and  
320 genetic knockout analyses confirmed that *cdvB2* was essential in *S. islandicus* M.16.4, in  
321 agreement with a previous study demonstrating *cdvB2* was essential and played crucial roles in  
322 the late stages of cell division in *S. islandicus* REY15A<sup>70</sup>. In contrast, the *cdvB1* gene, which  
323 has been shown to be essential and involved in the early stage of cell division in *S. islandicus*  
324 REY15A<sup>70</sup>, was very unlikely essential in our strain as validated by both Tn-seq ( $\log_2FC=0.48$ ;  
325 EI=18) and genetic knockout analyses (Supplementary Fig. 3b).

326

327 *Sulfolobus* species utilize a hybrid DNA-partition machine, consisting of two interacting  
328 components SegA and SegB, to drive chromosome segregation during M phase of the cell cycle  
329 <sup>72</sup>. Unexpectedly, Tn-seq analysis revealed *segA* (M164\_2088; arCOG functional category [D])  
330 and *segB* (M164\_2087; arCOG functional category [S]) were non-essential in *S. islandicus*  
331 M.16.4, in agreement with genetic knockout experiments (Supplementary Fig. 3b). Further  
332 phenotypic characterization of the mutant strains with in-frame deletion in *segA*, *segB*, and  
333 *segAB* will help us to dissect the mechanism of chromosome segregation system in *Sulfolobus*  
334 species. The remaining essential gene in arCOG functional category [D] M164\_1692 encodes  
335 an ATPase-like protein conserved in all three domains.

336

337 **Gene essentiality in central carbon metabolism (CCM)**

338 We also examined gene essentiality in pathways of CCM, including glycolysis,  
339 gluconeogenesis, and the oxidative TCA cycle, which have been well reconstructed in a related  
340 species *S. solfataricus* P2<sup>73</sup>.

341

342 Among the genes in glycolysis and gluconeogenesis predicted by the reconstructed central  
343 metabolic pathways in *S. solfataricus*<sup>73</sup> and KEGG pathway database, five genes were possibly  
344 essential as revealed by Tn-seq data. Among those, three genes, encoding enzymes fructose-  
345 bisphosphatase (M164\_1862), glucose-6-phosphate isomerase (M164\_0092), and  
346 phosphoglucomutase (M164\_1935), respectively, were involved in the last three steps of  
347 gluconeogenesis. The fourth, *M164\_2166*, encodes the 2-keto-3-deoxy-(6-phospho) gluconate  
348 aldolase (KDG aldolase). The remaining candidate essential gene involved in  
349 glycolysis/gluconeogenesis was *M164\_2749*, encoding the alpha subunit of 2-oxoacid:  
350 ferredoxin oxidoreductase (OFOR) that was presumably responsible for the formation of  
351 acetyl-CoA from pyruvate.

352

353 Next, we surveyed the essentiality of genes that involved in the reversed ribulose-  
354 monophosphate pathway (RuMP), a pathway that substitutes the classic pentose phosphate  
355 pathway (PPP) in most of archaea including *S. islandicus* M.16.4. Like other *Sulfolobus*  
356 species<sup>74</sup>, *S. islandicus* M.16.4 contains all enzymes involved in the RuMP pathway, including  
357 6-phospho-3-hexuloisomerase (M164\_1993), 3-hexulose-6-phosphate synthase (M164\_1939),  
358 ribose-5-phosphate isomerase (M164\_1228), ribose-phosphate pyrophosphokinase  
359 (M164\_1165), and transketolase fused by two subunits (M164\_1848/M164\_1849). Our Tn-seq  
360 data showed that all six genes were essential, suggesting that the RuMp pathway was  
361 indispensable for cell survival in *S. islandicus* under standard laboratory conditions.

362

363 Comparative genomic analysis showed that *S. islandicus* M.16.4 harbors a complete TCA cycle.  
364 The candidate enzymes for all steps of TCA cycle were present except for the 2-oxoglutarate  
365 dehydrogenase complex (OGDC). Considering the absence of OGDC and the broad substrate  
366 specificity of OFOR towards 2-oxoacids<sup>73,75</sup>, formation of succinyl-CoA from 2-oxoglutarate  
367 in the TCA cycle was proposed to be operated by the OFOR in *S. islandicus* M.16.4 as well.  
368 There are 13 genes encoding for core enzymes of the TCA cycle in *S. islandicus* M.16.4, 12  
369 of which were shown to be essential, whereas the remaining one, *M164\_2478*, encoding the  
370 beta subunit of SisOFOR, was classified as “unassigned”. Notably, three other SisOFOR  
371 (*M164\_2479/M164\_2478*) paralogous gene pairs i.e. *M164\_0365/M164\_0364*,  
372 *M164\_0396/M164\_0395*, and *M164\_2553/M164\_2552* are present in *S. islandicus* M.16.4, all  
373 of which were non-essential. These observations and our experimental data demonstrated that



374 physiological roles of SisOFOR (*M164\_2479/M164\_2478*) were irreplaceable in the TCA  
375 cycle. Lastly, our Tn-seq data revealed that *M164\_0683* and *M164\_0684*, encoding isocitrate  
376 lyase and malate synthase, respectively, were non-essential, indicating the glyoxylate cycle was  
377 not required in our laboratory conditions.

378

379

380

381

382

383

384

385

386

387

388

389

390

391

392

393

394

395

396

397

398

399

400

401

402

403

404

405

406

407

408

409

410

411 **Supplementary Tables**

412

413 **Supplementary Table 1: Summary of number of reads and insertions in three**  
414 **independent transposon mutant libraries**

| Library | No. of colonies | Colony collection way | No. of reads mapped to the genome | No. of unique insertions in total | No. of unique insertions(>1 reads) | No. of unique insertions(>2 reads) | No. of unique insertions(>3 reads) |
|---------|-----------------|-----------------------|-----------------------------------|-----------------------------------|------------------------------------|------------------------------------|------------------------------------|
| CYZ-TL1 | 25,318          | Pick                  | $2.9 \times 10^7$                 | 83,906                            | 30,210                             | 23,948                             | 22,539                             |
| CYZ-TL2 | 36,840          | Wash                  | $1.7 \times 10^7$                 | 47,967                            | 34,664                             | 33,881                             | 33,582                             |
| CYZ-TL2 | 43,810          | Wash                  | $2.5 \times 10^6$                 | 35,217                            | 33,712                             | 33,132                             | 32,640                             |
| Total   | 105,968         | -                     | -                                 | 167,090                           | 98,586                             | 90,961                             | 88,761                             |

415

416 **Supplementary Table 2: Summary of self-nucleotide BLAST results that reveal matching**  
417 **sections elsewhere in the genome**

| Locus tag | Start   | End     | Match start | Match end | Match length (bp) | Match ID% | Genes hit |
|-----------|---------|---------|-------------|-----------|-------------------|-----------|-----------|
| M164_0862 | 808672  | 809127  | 2010585     | 2010442   | 144               | 97.22     | None      |
| M164_1012 | 952035  | 951631  | 559226      | 558828    | 406               | 83.5      | M164_0624 |
| M164_1867 | 1712920 | 1711262 | 1264800     | 1264914   | 115               | 86.09     | M164_1334 |

418

419 **Supplementary Table 3: Evaluation of selected essential/non-essential gene candidates**  
420 **inferred by Tn-seq, and then confirmed with genetic knockout analysis in *S. islandicus***

| Cellular Process                  | Gene symbols/locus tags <sup>#</sup>                                                    | Essentiality by Tn-seq | Essentiality by KO assay <sup>##</sup> | Source/Reference             |
|-----------------------------------|-----------------------------------------------------------------------------------------|------------------------|----------------------------------------|------------------------------|
| Replication                       | <i>orc1-1, orc1-2, orc1-3, whip</i>                                                     | -                      | -                                      | <sup>76</sup>                |
|                                   | <i>mcm, gins23, gins15, priS, rpa, dpoB1, rfcL, rfcS, fen1, cdc45, nrdJ, dnaG, pbp2</i> | +                      | +                                      | This study and <sup>34</sup> |
|                                   | <i>pcna1, pcna2, pcna3</i>                                                              | +                      | +                                      | <sup>13</sup>                |
|                                   | <i>lig, priL, priX, rnhII</i>                                                           | Unassigned             | +                                      | This study and <sup>17</sup> |
|                                   | <i>dpoB2, dpoB3, dpo4, pbp1, nrdB</i>                                                   | -                      | -                                      | This study                   |
| Recombination /Repair             | <i>nurA, rad50, mre11, herA, radA</i>                                                   | +                      | +                                      | <sup>34</sup>                |
|                                   | <i>radB, radC1, radC2</i>                                                               | -                      | -                                      | <sup>34,77</sup>             |
|                                   | <i>hje, hjc</i>                                                                         | -                      | -                                      | <sup>78</sup>                |
|                                   | <i>hjm (hel308a), xer</i>                                                               | -                      | -                                      | This study                   |
|                                   | <i>xpb1, xpb2, xpd, xpf, bax1, phrB</i>                                                 | -                      | -                                      | <sup>34</sup>                |
|                                   | <i>endoMS, ogt, ogg2, udg5</i>                                                          | -                      | -                                      | This study                   |
|                                   | <i>exoIII, endoIII, endoIV, endoV</i>                                                   | -                      | -                                      | This study and <sup>79</sup> |
|                                   | <i>udg4</i>                                                                             | Unassigned             | -                                      | This study                   |
| Chromatin                         | <i>topR1</i>                                                                            | -                      | -                                      | This study                   |
|                                   | <i>topR2</i>                                                                            | +                      | -                                      | This study                   |
|                                   | <i>topIII (topIA)</i>                                                                   | -                      | -                                      | <sup>80</sup>                |
|                                   | <i>top6A, top6B</i>                                                                     | +                      | +                                      | This study                   |
|                                   | <i>cren7, alba1</i>                                                                     | +                      | +                                      | This study                   |
|                                   | <i>sul7d1, sul7d2, alba2, sir2, pat</i>                                                 | -                      | -                                      | This study                   |
| Cell division /genome segregation | <i>cdvA, cdvB, cdvC, cdvB2</i>                                                          | +                      | +                                      | This study                   |
|                                   | <i>cdvB3</i>                                                                            | +                      | -                                      | This study                   |
|                                   | <i>cdvB1</i>                                                                            | -                      | -                                      | This study                   |

|                             |                                                                                                                                         |            |                |            |
|-----------------------------|-----------------------------------------------------------------------------------------------------------------------------------------|------------|----------------|------------|
|                             | <i>segA, segB</i>                                                                                                                       | -          | -              | This study |
| Transcription               | <i>tbp, tfb1, tfb2, tfe-a, tfe-β, nusA, nusA-like, nusG, spt4</i>                                                                       | +          | +              | This study |
|                             | <i>tfs2</i>                                                                                                                             | Unassigned | +              | This study |
|                             | <i>rpo8</i>                                                                                                                             | Unassigned | -              | This study |
|                             | <i>tfb3, tfs1, tfs3, tfs4, tip49, rpo13</i>                                                                                             | -          | -              | This study |
| Translation                 | <i>alaX1, alaX2, leuS2, thrS2, selBL</i>                                                                                                | -          | -              | This study |
|                             | <i>thrS1</i>                                                                                                                            | Unassigned | +              | This study |
| Other functional categories | <i>lacS, pyrE, pyrF, amyA, upsE, upsF, cas1, cas3', cas3'', cas6, csa5, cas7, cmr2a (cas10), cas4, cas2, csa1, cbp1, csa3a*, csa3b,</i> | -          | -              | 81-89      |
|                             | <i>cas5</i>                                                                                                                             | +          | +              | This study |
|                             | <i>pinA</i>                                                                                                                             | +          | +              | 90         |
|                             | <i>aKMT</i>                                                                                                                             | -          | -              | 79         |
|                             | <i>M164_0809, M164_2103, M164_2020</i>                                                                                                  | -          | -              | This study |
|                             | <i>M164_1243</i>                                                                                                                        | +          | +              | 91         |
|                             | <i>M164_1756, M164_0737</i>                                                                                                             | -          | -              | 91         |
|                             | <i>M164_1060</i>                                                                                                                        | +          | +              | This study |
|                             | <i>apt</i>                                                                                                                              | +          | - <sup>§</sup> | 83         |

421

422 +: Essential; -: Non-essential.

423 #: Locus tags and annotations of genes were shown in Supplementary Dataset 10.

424 ##KO assay: Gene knockout experiment was performed at least 4 times for every possibly essential/non-  
425 essential gene inferred by Tn-seq. The gene essentiality in the KO assay was determined based on the  
426 facts that no transformants or only false positive transformants were obtained in nutrition-rich plates with  
427 10-20 days' incubation at 76-78 °C.

428 \*: The *csa3a* gene that encodes for a transcriptional regulator of *cas* genes<sup>87</sup> in *S. islandicus* M.16.4 is  
429 split by an approximate 14 kb of integrated provirus.

430 §: The strain with an inactivation of *apt* gene, encoding the adenine phosphoribosyltransferase, exhibited  
431 extremely slow/poor growth on solid plates lacking AMP or GMP<sup>83</sup>.

432

433 **Supplementary Table 4: Comparison of observed phyletic distribution to 100 scaled**  
434 **randomizations in terms of number of genes**

| Category     | # genes observed | Mean # genes simulated | stdev genes simulated | P <sub>above</sub> | P <sub>below</sub> | P <sub>2-tail</sub> |
|--------------|------------------|------------------------|-----------------------|--------------------|--------------------|---------------------|
| Universal    | 141              | 163.83                 | 3.52                  | 0                  | 0                  | 0                   |
| EA           | 80               | 8.69                   | 2.82                  | 0                  | 0                  | 0                   |
| Archaea      | 55               | 9.81                   | 2.66                  | 0                  | 0                  | 0                   |
| TACK         | 18               | 10.39                  | 3.21                  | 0                  | 0                  | 0                   |
| Sulfolobales | 73               | 147.09                 | 3.89                  | 0                  | 0                  | 0                   |
| Other        | 74               | 61.96                  | 5.59                  | 0                  | 0.02               | 0.02                |

435

436 **Notes:** P-values are an estimate based on simulated distribution (See “Methods”). Counts in  
437 the “Simulated” columns are the arithmetic mean of 100 random counts. Categories are defined

438 in Table 1.

439

440 **Supplementary Table 5: Summary of essential genes compared to previously assembled**

441 **ancient gene sets (a summary of Supplementary Dataset 8)**

| Total conserved COGs in <i>S. islandicus</i> | Excluded conserved* | Essential conserved† | % Conserved essential‡ | References                                                                            |
|----------------------------------------------|---------------------|----------------------|------------------------|---------------------------------------------------------------------------------------|
| 99                                           | 6                   | 67                   | 72%                    | <sup>92</sup> Puigbò, et al. 2009 NUTs (COGs)                                         |
| 78                                           | 3                   | 64                   | 85%                    | <sup>93</sup> Harris, et al. 2003 LCA (COGs)                                          |
| 236                                          | 25                  | 123                  | 58%                    | <sup>94</sup> Gil, et al. 2003 (COGs)                                                 |
| 165                                          | 57                  | 56                   | 52%                    | <sup>95</sup> Weiss, et al. 2016 LUCA (COGs)                                          |
| 931                                          | 153                 | 314                  | 40%                    | <sup>96</sup> Wolf, et al. 2012 LACA (arCOGs)                                         |
| 26                                           | 0                   | 25                   | 96%                    | <sup>97</sup> Guy and Ettema 2011 Universal Genes (COGs)                              |
| 48                                           | 1                   | 36                   | 77%                    | <sup>98</sup> Raymann, et al. 2015 Archaea/Bacteria (COGs)                            |
| 73                                           | 2                   | 57                   | 80%                    | <sup>98</sup> Raymann, et al. 2015 Archaea/Eukaryota (COGs) <sup>97</sup>             |
| 24                                           | 6                   | 10                   | 56%                    | <sup>99,100</sup> ESPs and membrane remodeling proteins in <i>Sulfolobus</i> (arCOGs) |
| 34                                           | 0                   | 29                   | 85%                    | <sup>101</sup> Yutin, et al. 2012 universal ribosomal proteins (arCOGs)               |
| 386                                          | 70                  | 157                  | 50%                    | <sup>102</sup> Mirkin, et al. 2003 LUCA (COGs)                                        |
| 111                                          | 10                  | 73                   | 72%                    | <sup>103</sup> Makarova, et al. 2015 (arCOGs)                                         |

442 \* Excluded because of multiple matching gene for COGs.

443 † At least one *S. islandicus* gene in COG is essential.

444 ‡ Equal to (Essential) / (Total – Excluded).

445

446 **Supplementary Table 6: Poorly characterized essential genes shared within Archaea,**

447 **Eukaryotes, and Sulfolobales**

| Locus tags | Phyletic category | arCOG      | Predicted characteristics                                 |
|------------|-------------------|------------|-----------------------------------------------------------|
| M164_1243  | Archaea           | arCOG00557 | Lhr-like helicase with C-terminal Zn finger domain        |
| M164_1908  | Archaea           | arCOG00933 | Radical SAM superfamily enzyme                            |
| M164_1554  | Archaea           | arCOG04116 | ATPase (PiIT family)                                      |
| M164_1444  | Archaea           | arCOG04055 | SHS2 domain protein implicated in nucleic acid metabolism |
| M164_1735  | Archaea           | arCOG04076 | Uncharacterized protein, DUF359 family                    |

|           |                    |            |                                                                                                                                 |
|-----------|--------------------|------------|---------------------------------------------------------------------------------------------------------------------------------|
| M164_1930 | Archaea            | arCOG01831 | Predicted nucleotidyltransferase                                                                                                |
| M164_1582 | Archaea            | arCOG01285 | OB-fold domain and Zn-ribbon containing protein, possible acyl-CoA-binding protein                                              |
| M164_1410 | Archaea            | arCOG04458 | Uncharacterized protein of DIM6/NTAB family                                                                                     |
| M164_1948 | Archaea            | arCOG04290 | PIN-domain and Zn ribbon                                                                                                        |
| M164_1373 | Archaea            | arCOG00543 | Predicted metal-dependent RNase, consists of a metallo-beta-lactamase domain and an RNA-binding KH domain                       |
| M164_2044 | Archaea            | arCOG00932 | Uncharacterized protein related to pyruvate formate-lyase activating enzyme                                                     |
| M164_1168 | Archaea            | arCOG01043 | Predicted RNA binding protein with dsRBD fold                                                                                   |
| M164_1936 | Archaea            | arCOG04124 | Uncharacterized protein, Trm112 family                                                                                          |
| M164_1350 | Archaea            | arCOG04308 | Uncharacterized protein                                                                                                         |
| M164_0237 | Eukaryotes/Archaea | arCOG04265 | C4-type Zn-finger protein                                                                                                       |
| M164_0664 | Sulfolobales       | arCOG01314 | Uncharacterized membrane anchored protein with extracellular flavodoxin-like domain, a component of a putative secretion system |
| M164_2107 | Sulfolobales       | arCOG05396 | Uncharacterized membrane protein                                                                                                |
| M164_1303 | Sulfolobales       | arCOG08333 | Uncharacterized protein                                                                                                         |
| M164_1025 | Sulfolobales       | arCOG08451 | Uncharacterized protein                                                                                                         |
| M164_1520 | Sulfolobales       | arCOG05995 | Uncharacterized protein                                                                                                         |
| M164_0149 | Sulfolobales       | arCOG07185 | Uncharacterized protein                                                                                                         |
| M164_1645 | Sulfolobales       | arCOG05923 | Uncharacterized protein                                                                                                         |
| M164_1726 | Sulfolobales       | arCOG05939 | Uncharacterized protein                                                                                                         |
| M164_1958 | Sulfolobales       | arCOG08308 | Uncharacterized protein                                                                                                         |
| M164_0627 | Sulfolobales       | arCOG03239 | ATPase, predicted component of phage defense system                                                                             |
| M164_0066 | Sulfolobales       | arCOG01098 | Uncharacterized protein                                                                                                         |
| M164_1338 | Sulfolobales       | arCOG05983 | Uncharacterized protein                                                                                                         |
| M164_0682 | Sulfolobales       | arCOG08424 | Uncharacterized protein                                                                                                         |
| M164_1275 | Sulfolobales       | arCOG05980 | Uncharacterized protein                                                                                                         |

|           |              |            |                                                              |
|-----------|--------------|------------|--------------------------------------------------------------|
| M164_0178 | Sulfolobales | arCOG00442 | von Willebrand factor type A (vWA) domain containing protein |
| M164_2177 | Sulfolobales | arCOG05926 | Uncharacterized protein                                      |
| M164_0169 | Sulfolobales | arCOG05958 | Uncharacterized protein                                      |
| M164_2151 | Sulfolobales | arCOG03699 | Uncharacterized membrane protein                             |
| M164_1620 | Sulfolobales | arCOG09897 | Uncharacterized protein                                      |
| M164_0677 | Sulfolobales | arCOG13101 | Uncharacterized protein                                      |
| M164_1289 | Sulfolobales | arCOG04323 | Zn-finger protein                                            |
| M164_1789 | Sulfolobales | arCOG06088 | Zn finger protein                                            |
| M164_1865 | Sulfolobales | arCOG07188 | Uncharacterized protein                                      |
| M164_1724 | Sulfolobales | arCOG05941 | Uncharacterized protein                                      |
| M164_1345 | Sulfolobales | arCOG07185 | Uncharacterized protein                                      |
| M164_0089 | Sulfolobales | arCOG05899 | Cell surface protein                                         |
| M164_1302 | Sulfolobales | arCOG04103 | Zn finger protein                                            |
| M164_2100 | Sulfolobales | arCOG01830 | Predicted nucleotidyltransferase                             |
| M164_2636 | Sulfolobales | arCOG06032 | Uncharacterized membrane protein, DUF1404 family             |
| M164_0727 | Sulfolobales | arCOG10132 | Uncharacterized protein                                      |
| M164_1483 | Sulfolobales | arCOG05997 | Uncharacterized protein                                      |
| M164_0224 | Sulfolobales | arCOG05950 | Uncharacterized protein                                      |
| M164_0254 | Sulfolobales | arCOG05929 | Uncharacterized protein                                      |
| M164_1337 | Sulfolobales | arCOG06043 | Uncharacterized protein                                      |
| M164_0165 | Sulfolobales | arCOG07197 | Uncharacterized membrane protein                             |
| M164_0246 | Sulfolobales | arCOG08319 | Uncharacterized protein                                      |
| M164_2845 | Sulfolobales | arCOG07934 | Uncharacterized protein                                      |
| M164_1032 | Sulfolobales | arCOG07229 | Uncharacterized protein                                      |
| M164_0037 | Sulfolobales | arCOG05885 | Uncharacterized protein                                      |
| M164_2723 | Sulfolobales | arCOG05922 | Uncharacterized protein                                      |
| M164_1572 | Sulfolobales | arCOG04251 | Uncharacterized protein                                      |
| M164_2767 | Sulfolobales | arCOG03031 | Chlorite dismutase                                           |
| M164_1332 | Sulfolobales | arCOG04160 | Uncharacterized protein                                      |
| M164_0185 | Sulfolobales | arCOG05956 | Metal-binding protein with CxxC..HxxxxH signature            |
| M164_0756 | Sulfolobales | arCOG07185 | Uncharacterized protein                                      |
| M164_1251 | Sulfolobales | arCOG07217 | Uncharacterized protein                                      |

448

449

450

451

**Supplementary Table 7: Strains and plasmids used in this study**

| Strains and plasmids                                    | Genotypes/Descriptions                                                                                      | Reference /Source |
|---------------------------------------------------------|-------------------------------------------------------------------------------------------------------------|-------------------|
| <b>Strains</b>                                          |                                                                                                             |                   |
| <i>S. islandicus</i> M.16.4                             | Wild type                                                                                                   | <sup>104</sup>    |
| <i>S. solfataricus</i> P2                               | Wild type                                                                                                   | DSMZ              |
| <i>S. islandicus</i> RJW004                             | $\Delta$ pyrEF $\Delta$ lacS $\Delta$ argD; Derived from <i>S. islandicus</i> M.16.4                        | <sup>81</sup>     |
| <i>S. islandicus</i> RJW008                             | $\Delta$ argD; derived from <i>S. islandicus</i> M.16.4                                                     | <sup>105</sup>    |
| <i>S. islandicus</i> RJW011                             | RJW004 $\Delta$ slaA ( $\Delta$ slaA); slaA was deleted from RJW004 via in-frame deletion                   | This study        |
| <i>S. islandicus</i> RJW012                             | RJW004 $\Delta$ slaB ( $\Delta$ slaB); slaB was deleted from RJW004 via in-frame deletion                   | This study        |
| <i>S. islandicus</i> RJW013                             | RJW004 $\Delta$ slaAB ( $\Delta$ slaAB); slaA and slaB were deleted from RJW004 via in-frame deletion       | This study        |
| <i>S. islandicus</i> $\Delta$ slaAB $\Delta$ M 164_1049 | $\Delta$ pyrEF $\Delta$ lacS $\Delta$ argD $\Delta$ slaAB $\Delta$ M 164_1049::StoargD; derived from RJW013 | This study        |
| <i>S. islandicus</i> $\Delta$ dpoB2                     | $\Delta$ argD $\Delta$ dpoB2::StoargD; derived from RJW008                                                  | This study        |
| <i>S. islandicus</i> $\Delta$ dpoB3                     | $\Delta$ argD $\Delta$ dpoB3::StoargD; derived from RJW008                                                  | This study        |
| <i>S. islandicus</i> $\Delta$ dpo4                      | $\Delta$ argD $\Delta$ dpo4::StoargD; derived from RJW008                                                   | This study        |
| <i>S. islandicus</i> $\Delta$ pbp1                      | $\Delta$ argD $\Delta$ pbp1::StoargD; derived from RJW008                                                   | This study        |
| <i>S. islandicus</i> $\Delta$ topR1                     | $\Delta$ argD $\Delta$ topR1::StoargD; derived from RJW008                                                  | This study        |
| <i>S. islandicus</i> $\Delta$ topR2                     | $\Delta$ argD $\Delta$ topR2::StoargD; derived from RJW008                                                  | This study        |
| <i>S. islandicus</i> $\Delta$ udg4                      | $\Delta$ argD $\Delta$ udg4::StoargD; derived from RJW008                                                   | This study        |
| <i>S. islandicus</i> $\Delta$ udg5                      | $\Delta$ argD $\Delta$ udg5::StoargD; derived from RJW008                                                   | This study        |
| <i>S. islandicus</i> $\Delta$ endoIII                   | $\Delta$ argD $\Delta$ endoIII::StoargD; derived from RJW008                                                | This study        |
| <i>S. islandicus</i> $\Delta$ endoV                     | $\Delta$ argD $\Delta$ endoV::StoargD; derived from RJW008                                                  | This study        |
| <i>S. islandicus</i> $\Delta$ ogt                       | $\Delta$ argD $\Delta$ ogt::StoargD; derived from RJW008                                                    | This study        |
| <i>S. islandicus</i> $\Delta$ ogg2                      | $\Delta$ argD $\Delta$ ogg2::StoargD; derived from RJW008                                                   | This study        |
| <i>S. islandicus</i> $\Delta$ nrdB                      | $\Delta$ argD $\Delta$ nrdB::StoargD; derived from RJW008                                                   | This study        |
| <i>S. islandicus</i> $\Delta$ sir2                      | $\Delta$ argD $\Delta$ sir2::StoargD; derived from RJW008                                                   | This study        |
| <i>S. islandicus</i> $\Delta$ pat                       | $\Delta$ argD $\Delta$ pat::StoargD; derived from RJW008                                                    | This study        |
| <i>S. islandicus</i> $\Delta$ alba2                     | $\Delta$ argD $\Delta$ alba2::StoargD; derived from RJW008                                                  | This study        |
| <i>S. islandicus</i> $\Delta$ sul7d1                    | $\Delta$ argD $\Delta$ sul7d1::StoargD; derived from RJW008                                                 | This study        |
| <i>S. islandicus</i> $\Delta$ sul7d2                    | $\Delta$ argD $\Delta$ sul7d2::StoargD; derived from RJW008                                                 | This study        |
| <i>S. islandicus</i> $\Delta$ segA                      | $\Delta$ argD $\Delta$ segA::StoargD; derived from RJW008                                                   | This study        |
| <i>S. islandicus</i> $\Delta$ segB                      | $\Delta$ argD $\Delta$ segB::StoargD; derived from RJW008                                                   | This study        |
| <i>S. islandicus</i> $\Delta$ xer                       | $\Delta$ argD $\Delta$ xer::StoargD; derived from RJW008                                                    | This study        |
| <i>S. islandicus</i> $\Delta$ hjm                       | $\Delta$ argD $\Delta$ hjm::StoargD; derived from RJW008                                                    | This study        |
| <i>S. islandicus</i> $\Delta$ endoMS                    | $\Delta$ argD $\Delta$ endoMS::StoargD; derived from RJW008                                                 | This study        |

|                                                |                                                                                                                                            |                |
|------------------------------------------------|--------------------------------------------------------------------------------------------------------------------------------------------|----------------|
| <i>S. islandicus</i> $\Delta$ <i>cdvB1</i>     | $\Delta$ <i>argD</i> $\Delta$ <i>cdvB1</i> :: <i>StoargD</i> ; derived from RJW008                                                         | This study     |
| <i>S. islandicus</i> $\Delta$ <i>cdvB3</i>     | $\Delta$ <i>argD</i> $\Delta$ <i>cdvB3</i> :: <i>StoargD</i> ; derived from RJW008                                                         | This study     |
| <i>S. islandicus</i> $\Delta$ <i>tfb3</i>      | $\Delta$ <i>argD</i> $\Delta$ <i>tfb3</i> :: <i>StoargD</i> ; derived from RJW008                                                          | This study     |
| <i>S. islandicus</i> $\Delta$ <i>M164_0809</i> | $\Delta$ <i>argD</i> $\Delta$ <i>M164_0809</i> :: <i>StoargD</i> ; derived from RJW008                                                     | This study     |
| <i>S. islandicus</i> $\Delta$ <i>M164_2020</i> | $\Delta$ <i>argD</i> $\Delta$ <i>M164_2020</i> :: <i>StoargD</i> ; derived from RJW008                                                     | This study     |
| <i>S. islandicus</i> $\Delta$ <i>M164_2103</i> | $\Delta$ <i>argD</i> $\Delta$ <i>M164_2103</i> :: <i>StoargD</i> ; derived from RJW008                                                     | This study     |
| <i>S. islandicus</i> $\Delta$ <i>tip49</i>     | $\Delta$ <i>argD</i> $\Delta$ <i>tip49</i> :: <i>StoargD</i> ; derived from RJW008                                                         | This study     |
| <i>S. islandicus</i> $\Delta$ <i>tfs1</i>      | $\Delta$ <i>argD</i> $\Delta$ <i>tfs1</i> :: <i>StoargD</i> ; derived from RJW008                                                          | This study     |
| <i>S. islandicus</i> $\Delta$ <i>tfs3</i>      | $\Delta$ <i>argD</i> $\Delta$ <i>tfs3</i> :: <i>StoargD</i> ; derived from RJW008                                                          | This study     |
| <i>S. islandicus</i> $\Delta$ <i>tfs4</i>      | $\Delta$ <i>argD</i> $\Delta$ <i>tfs4</i> :: <i>StoargD</i> ; derived from RJW008                                                          | This study     |
| <i>S. islandicus</i> $\Delta$ <i>rpo8</i>      | $\Delta$ <i>argD</i> $\Delta$ <i>rpo8</i> :: <i>StoargD</i> ; derived from RJW008                                                          | This study     |
| <i>S. islandicus</i> $\Delta$ <i>rpo13</i>     | $\Delta$ <i>argD</i> $\Delta$ <i>rpo13</i> :: <i>StoargD</i> ; derived from RJW008                                                         | This study     |
| <i>S. islandicus</i> $\Delta$ <i>alaX1</i>     | $\Delta$ <i>argD</i> $\Delta$ <i>alaX1</i> :: <i>StoargD</i> ; derived from RJW008                                                         | This study     |
| <i>S. islandicus</i> $\Delta$ <i>alaX2</i>     | $\Delta$ <i>argD</i> $\Delta$ <i>alaX2</i> :: <i>StoargD</i> ; derived from RJW008                                                         | This study     |
| <i>S. islandicus</i> $\Delta$ <i>selBL</i>     | $\Delta$ <i>argD</i> $\Delta$ <i>selBL</i> :: <i>StoargD</i> ; derived from RJW008                                                         | This study     |
| <i>S. islandicus</i> $\Delta$ <i>leuS2</i>     | $\Delta$ <i>argD</i> $\Delta$ <i>leuS2</i> :: <i>StoargD</i> ; derived from RJW008                                                         | This study     |
| <i>S. islandicus</i> $\Delta$ <i>thrS2</i>     | $\Delta$ <i>argD</i> $\Delta$ <i>thrS2</i> :: <i>StoargD</i> ; derived from RJW008                                                         | This study     |
| <b>Plasmids</b>                                |                                                                                                                                            |                |
| pMOD <sup>TM</sup> -2 <MCS>                    | Transposon construction vector                                                                                                             | Epicentre, USA |
| pT-SsoargD                                     | pMOD <sup>TM</sup> -2 <MCS> carrying an <i>argD</i> expression cassette derived from <i>S. solfataricus</i> P2                             | This study     |
| pSeSd                                          | <i>Sulfolobus-E. coli</i> shuttle vector                                                                                                   | <sup>106</sup> |
| pSeSd-SsoargD                                  | pSeSd carrying an <i>argD</i> expression cassette derived from <i>S. solfataricus</i> P2                                                   | This study     |
| pSeSd-StoargD                                  | pSeSd carrying an <i>argD</i> expression cassette derived from <i>S. tokodaii</i>                                                          | <sup>105</sup> |
| pRJW8                                          | pUC19 carrying a triple marker gene cassette <i>pyrEF-lacS-argD</i> derived from <i>S. solfataricus</i> P2; cloning vector                 | <sup>81</sup>  |
| pMID-slaA                                      | pRJW8 carrying Up-arm and Dn-arm of <i>slaA</i> and a partial region of <i>slaA</i> (Tg-arm); <i>slaA</i> knockout plasmid                 | This study     |
| pMID-slaB                                      | pRJW8 carrying Up-arm and Dn-arm of <i>slaA</i> and a partial region of <i>slaB</i> (Tg-arm); <i>slaB</i> knockout plasmid                 | This study     |
| pMID-slaAB                                     | pRJW8 carrying Up-arm of <i>slaA</i> , Dn-arm of <i>slaB</i> , and a partial region of <i>slaB</i> (Tg-arm); <i>slaAB</i> knockout plasmid | This study     |

453  
454  
455  
456  
457  
458  
459  
460  
461



462 **Supplementary Table 8: Expected sizes of amplicons generated from the genetic host**  
 463 **(Wt) and mutant strains using two different primer sets**

| Gene name                 | Gene length (bp) | Deletion region (bp) | Replace region (bp) | Flanking primers   |        | Internal primers   |        |
|---------------------------|------------------|----------------------|---------------------|--------------------|--------|--------------------|--------|
|                           |                  |                      |                     | Amplicon size (bp) |        | Amplicon size (bp) |        |
|                           |                  |                      |                     | Wt                 | Mutant | Wt                 | Mutant |
| <i>dpoB2</i>              | 1668             | 1276                 | 740                 | 1836               | 1300   | 990                | 0      |
| <i>dpoB3</i>              | 2292             | 1858                 | 740                 | 2395               | 1277   | 868                | 0      |
| <i>dpo4</i>               | 1059             | 897                  | 740                 | 1168               | 1011   | 547                | 0      |
| <i>pbp1</i>               | 294              | 189                  | 740                 | 554                | 1105   | 155                | 0      |
| <i>topR1</i>              | 3720             | 3520                 | 740                 | 3996               | 1216   | 777                | 0      |
| <i>topR2</i>              | 3501             | 3250                 | 740                 | 3788               | 1278   | 638                | 0      |
| <i>slaA</i> <sup>#</sup>  | 3690             | 3636                 | 6                   | 5870               | 2240   | 740                | 0      |
| <i>slaB</i> <sup>#</sup>  | 1194             | 1173                 | 6                   | 3193               | 2026   | 540                | 0      |
| <i>slaAB</i> <sup>#</sup> | N.A <sup>s</sup> | 4865                 | 6                   | 6973               | 2114   | 2014               | 0      |
| <i>M164_1049</i>          | 1803             | 1761                 | 740                 | 2109               | 1046   | 1159               | 0      |
| <i>udg4</i>               | 651              | 466                  | 740                 | 897                | 1171   | 312                | 0      |
| <i>udg5</i>               | 669              | 613                  | 740                 | 847                | 974    | 327                | 0      |
| <i>endoIII</i>            | 702              | 532                  | 740                 | 778                | 986    | 375                | 0      |
| <i>endoV</i>              | 597              | 481                  | 740                 | 743                | 1002   | 336                | 0      |
| <i>ogt</i>                | 456              | 413                  | 740                 | 643                | 970    | 397                | 0      |
| <i>ogg2</i>               | 624              | 467                  | 740                 | 697                | 970    | 277                | 0      |
| <i>nrdB</i>               | 927              | 873                  | 740                 | 1116               | 983    | 560                | 0      |
| <i>sir2</i>               | 744              | 587                  | 740                 | 830                | 983    | 352                | 0      |
| <i>pat</i>                | 483              | 422                  | 740                 | 647                | 965    | 251                | 0      |
| <i>alba2</i>              | 270              | 228                  | 740                 | 477                | 989    | 181                | 0      |
| <i>sul7d1</i>             | 195              | 195                  | 740                 | 370                | 915    | N.D*               | N.D*   |
| <i>sul7d2</i>             | 195              | 194                  | 740                 | 457                | 1003   | N.D*               | N.D*   |
| <i>M164_0809</i>          | 2001             | 1810                 | 740                 | 2319               | 1249   | 1012               | 0      |
| <i>M164_2020</i>          | 2628             | 2449                 | 740                 | 2827               | 1118   | 965                | 0      |
| <i>M164_2103</i>          | 2226             | 1887                 | 740                 | 2262               | 1115   | 769                | 0      |
| <i>segA</i>               | 663              | 594                  | 740                 | 865                | 1011   | 383                | 0      |
| <i>segB</i>               | 330              | 253                  | 740                 | 554                | 1041   | 201                | 0      |
| <i>cdvB1</i>              | 762              | 490                  | 740                 | 755                | 1005   | 380                | 0      |
| <i>tfb3</i>               | 513              | 431                  | 740                 | 895                | 1204   | 250                | 0      |
| <i>hjm</i>                | 2148             | 2009                 | 740                 | 2354               | 1085   | 780                | 0      |
| <i>xer</i>                | 876              | 842                  | 740                 | 1017               | 915    | 598                | 0      |
| <i>endoMS</i>             | 732              | 635                  | 740                 | 934                | 1039   | 502                | 0      |
| <i>cdvB3</i>              | 507              | 436                  | 740                 | 843                | 1147   | 301                | 0      |
| <i>tfs1</i>               | 336              | 276                  | 740                 | 694                | 1158   | 254                | 0      |
| <i>tfs3</i>               | 273              | 215                  | 740                 | 546                | 1071   | 185                | 0      |
| <i>tfs4</i>               | 228              | 180                  | 740                 | 610                | 1170   | 108                | 0      |
| <i>tip49</i>              | 1359             | 1227                 | 740                 | 1771               | 1284   | 569                | 0      |
| <i>rpo13</i>              | 315              | 180                  | 740                 | 615                | 1175   | 164                | 0      |
| <i>rpo8</i>               | 399              | 310                  | 740                 | 727                | 1157   | 266                | 0      |
| <i>selBL</i>              | 906              | 846                  | 740                 | 1026               | 920    | 553                | 0      |
| <i>leuS2</i>              | 2805             | 2507                 | 740                 | 2902               | 1135   | 1166               | 0      |
| <i>thrS2</i>              | 1161             | 1018                 | 740                 | 1554               | 1276   | 680                | 0      |
| <i>alaX1</i>              | 711              | 621                  | 740                 | 846                | 965    | 350                | 0      |
| <i>alaX2</i>              | 453              | 370                  | 740                 | 811                | 1181   | 327                | 0      |

464  
 465 # Deletions of *slaA*, *slaB*, and *slaAB* were achieved via a markerless in-frame deletion approach.

466 N.A<sup>s</sup>: Not applied.

467 N.D\*: Not determined.

468

469

470

471

## 472 **Supplementary references**

473

- 474 1 Sarmiento, F., Mrazek, J. & Whitman, W. B. Genome-scale analysis of gene function  
475 in the hydrogenotrophic methanogenic archaeon *Methanococcus maripaludis*. *Proc*  
476 *Natl Acad Sci U S A* **110**, 4726-4731, doi:10.1073/pnas.1220225110 (2013).
- 477 2 Pan, M., Santangelo, T. J., Li, Z., Reeve, J. N. & Kelman, Z. *Thermococcus*  
478 *kodakarensis* encodes three MCM homologs but only one is essential. *Nucleic Acids*  
479 *Res* **39**, 9671-9680, doi:10.1093/nar/gkr624 (2011).
- 480 3 Ishino, S. *et al.* Biochemical and genetical analyses of the three mcm genes from the  
481 hyperthermophilic archaeon, *Thermococcus kodakarensis*. *Genes Cells* **16**, 1176-  
482 1189, doi:10.1111/j.1365-2443.2011.01562.x (2011).
- 483 4 Liu, W., Pucci, B., Rossi, M., Pisani, F. M. & Ladenstein, R. Structural analysis of  
484 the *Sulfolobus solfataricus* MCM protein N-terminal domain. *Nucleic Acids Res* **36**,  
485 3235-3243, doi:10.1093/nar/gkn183 (2008).
- 486 5 Berquist, B. R., DasSarma, P. & DasSarma, S. Essential and non-essential DNA  
487 replication genes in the model halophilic Archaeon, *Halobacterium* sp. NRC-1. *BMC*  
488 *Genet* **8**, 31, doi:10.1186/1471-2156-8-31 (2007).
- 489 6 Xu, Y. *et al.* Archaeal orthologs of Cdc45 and GINS form a stable complex that  
490 stimulates the helicase activity of MCM. *Proc Natl Acad Sci U S A* **113**, 13390-  
491 13395, doi:10.1073/pnas.1613825113 (2016).
- 492 7 Burkhart, B. W. *et al.* The GAN Exonuclease or the Flap Endonuclease Fen1 and  
493 RNase HII Are Necessary for Viability of *Thermococcus kodakarensis*. *J Bacteriol*  
494 **199**, doi:10.1128/JB.00141-17 (2017).
- 495 8 Nagata, M. *et al.* The Cdc45/RecJ-like protein forms a complex with GINS and  
496 MCM, and is important for DNA replication in *Thermococcus kodakarensis*. *Nucleic*  
497 *Acids Res* **45**, 10693-10705, doi:10.1093/nar/gkx740 (2017).
- 498 9 Dieckman, L. M., Freudenthal, B. D. & Washington, M. T. PCNA structure and  
499 function: insights from structures of PCNA complexes and post-translationally  
500 modified PCNA. *Subcell Biochem* **62**, 281-299, doi:10.1007/978-94-007-4572-8\_15  
501 (2012).
- 502 10 Moldovan, G. L., Pfander, B. & Jentsch, S. PCNA, the maestro of the replication  
503 fork. *Cell* **129**, 665-679, doi:10.1016/j.cell.2007.05.003 (2007).
- 504 11 Chia, N., Cann, I. & Olsen, G. J. Evolution of DNA replication protein complexes in  
505 eukaryotes and Archaea. *PLoS One* **5**, e10866, doi:10.1371/journal.pone.0010866  
506 (2010).
- 507 12 Kuba, Y. *et al.* Comparative analyses of the two proliferating cell nuclear antigens  
508 from the hyperthermophilic archaeon, *Thermococcus kodakarensis*. *Genes Cells* **17**,  
509 923-937, doi:10.1111/gtc.12007 (2012).
- 510 13 Zhang, C. *et al.* Revealing the essentiality of multiple archaeal pcna genes using a  
511 mutant propagation assay based on an improved knockout method. *Microbiology* **156**,  
512 3386-3397, doi:10.1099/mic.0.042523-0 (2010).
- 513 14 Dionne, I., Nookala, R. K., Jackson, S. P., Doherty, A. J. & Bell, S. D. A  
514 heterotrimeric PCNA in the hyperthermophilic archaeon *Sulfolobus solfataricus*. *Mol*  
515 *Cell* **11**, 275-282 (2003).
- 516 15 Zuo, Z., Rodgers, C. J., Mikheikin, A. L. & Trakselis, M. A. Characterization of a  
517 functional DnaG-type primase in archaea: implications for a dual-primase system. *J*  
518 *Mol Biol* **397**, 664-676, doi:10.1016/j.jmb.2010.01.057 (2010).
- 519 16 Le Breton, M. *et al.* The heterodimeric primase from the euryarchaeon *Pyrococcus*  
520 *abyssi*: a multifunctional enzyme for initiation and repair? *J Mol Biol* **374**, 1172-  
521 1185, doi:10.1016/j.jmb.2007.10.015 (2007).
- 522 17 Liu, B. *et al.* A primase subunit essential for efficient primer synthesis by an archaeal  
523 eukaryotic-type primase. *Nat Commun* **6**, 7300, doi:10.1038/ncomms8300 (2015).

- 524 18 Lai, X., Shao, H., Hao, F. & Huang, L. Biochemical characterization of an ATP-  
525 dependent DNA ligase from the hyperthermophilic crenarchaeon *Sulfolobus shibatae*.  
526 *Extremophiles* **6**, 469-477, doi:10.1007/s00792-002-0284-5 (2002).
- 527 19 Zhan, K. & He, Z. G. Characterization of a new RNase HIII and its essential amino  
528 acid residues in the archaeon *Sulfolobus tokodaii* reveals a regulatory C-terminus.  
529 *Biochemistry (Mosc)* **75**, 930-937 (2010).
- 530 20 Choi, J. Y. *et al.* Roles of the four DNA polymerases of the crenarchaeon *Sulfolobus*  
531 *solfataricus* and accessory proteins in DNA replication. *J Biol Chem* **286**, 31180-  
532 31193, doi:10.1074/jbc.M111.258038 (2011).
- 533 21 Taylor, K. A., Deatherage, J. F. & Amos, L. A. Structure of the S-Layer of  
534 *Sulfolobus-Acidocaldarius*. *Nature* **299**, 840-842, doi:DOI 10.1038/299840a0 (1982).
- 535 22 Edgell, D. R., Klenk, H. P. & Doolittle, W. F. Gene duplications in evolution of  
536 archaeal family B DNA polymerases. *J Bacteriol* **179**, 2632-2640 (1997).
- 537 23 Edgell, D. R., Malik, S. B. & Doolittle, W. F. Evidence of independent gene  
538 duplications during the evolution of archaeal and eukaryotic family B DNA  
539 polymerases. *Mol Biol Evol* **15**, 1207-1217,  
540 doi:10.1093/oxfordjournals.molbev.a026028 (1998).
- 541 24 Yan, J. *et al.* Identification and characterization of a heterotrimeric archaeal DNA  
542 polymerase holoenzyme. *Nat Commun* **8**, 15075, doi:10.1038/ncomms15075 (2017).
- 543 25 Abby, S. S. *et al.* *Candidatus Nitrosocaldus cavascurensis*, an Ammonia Oxidizing,  
544 Extremely Thermophilic Archaeon with a Highly Mobile Genome. *Front Microbiol*  
545 **9**, 28, doi:10.3389/fmicb.2018.00028 (2018).
- 546 26 Daebeler, A. *et al.* Cultivation and Genomic Analysis of "*Candidatus Nitrosocaldus*  
547 *islandicus*," an Obligately Thermophilic, Ammonia-Oxidizing Thaumarchaeon from a  
548 Hot Spring Biofilm in Graendalur Valley, Iceland. *Front Microbiol* **9**, 193,  
549 doi:10.3389/fmicb.2018.00193 (2018).
- 550 27 Cubonova, L. *et al.* Archaeal DNA polymerase D but not DNA polymerase B is  
551 required for genome replication in *Thermococcus kodakarensis*. *J Bacteriol* **195**,  
552 2322-2328, doi:10.1128/JB.02037-12 (2013).
- 553 28 Adam, P. S., Borrel, G., Brochier-Armanet, C. & Gribaldo, S. The growing tree of  
554 Archaea: new perspectives on their diversity, evolution and ecology. *ISME J* **11**,  
555 2407-2425, doi:10.1038/ismej.2017.122 (2017).
- 556 29 Guo, L. *et al.* Biochemical and structural characterization of Cren7, a novel  
557 chromatin protein conserved among Crenarchaea. *Nucleic Acids Res* **36**, 1129-1137,  
558 doi:10.1093/nar/gkm1128 (2008).
- 559 30 Ishino, S. *et al.* Identification of a mismatch-specific endonuclease in  
560 hyperthermophilic Archaea. *Nucleic Acids Res* **44**, 2977-2986,  
561 doi:10.1093/nar/gkw153 (2016).
- 562 31 White, M. F. & Allers, T. DNA Repair in the Archaea - an emerging picture. *FEMS*  
563 *Microbiol Rev*, doi:10.1093/femsre/fuy020 (2018).
- 564 32 Castaneda-Garcia, A. *et al.* A non-canonical mismatch repair pathway in prokaryotes.  
565 *Nat Commun* **8**, 14246, doi:10.1038/ncomms14246 (2017).
- 566 33 Ishino, S. *et al.* Activation of the mismatch-specific endonuclease EndoMS/NucS by  
567 the replication clamp is required for high fidelity DNA replication. *Nucleic Acids Res*,  
568 doi:10.1093/nar/gky460 (2018).
- 569 34 Zhang, C. *et al.* Genetic manipulation in *Sulfolobus islandicus* and functional analysis  
570 of DNA repair genes. *Biochem Soc Trans* **41**, 405-410, doi:10.1042/BST20120285  
571 (2013).
- 572 35 Fujikane, R., Ishino, S., Ishino, Y. & Forterre, P. Genetic analysis of DNA repair in  
573 the hyperthermophilic archaeon, *Thermococcus kodakaraensis*. *Genes Genet Syst* **85**,  
574 243-257 (2010).
- 575 36 Woods, W. G. & Dyall-Smith, M. L. Construction and analysis of a recombination-  
576 deficient (*radA*) mutant of *Haloferax volcanii*. *Mol Microbiol* **23**, 791-797 (1997).

577 37 Hawkins, M., Malla, S., Blythe, M. J., Nieduszynski, C. A. & Allers, T. Accelerated  
578 growth in the absence of DNA replication origins. *Nature* **503**, 544-547,  
579 doi:10.1038/nature12650 (2013).

580 38 Delmas, S., Duggin, I. G. & Allers, T. DNA damage induces nucleoid compaction via  
581 the Mre11-Rad50 complex in the archaeon *Haloferax volcanii*. *Mol Microbiol* **87**,  
582 168-179, doi:10.1111/mmi.12091 (2013).

583 39 Kish, A. & DiRuggiero, J. Rad50 is not essential for the Mre11-dependent repair of  
584 DNA double-strand breaks in *Halobacterium* sp. strain NRC-1. *J Bacteriol* **190**,  
585 5210-5216, doi:10.1128/JB.00292-08 (2008).

586 40 Delmas, S., Shunburne, L., Ngo, H. P. & Allers, T. Mre11-Rad50 promotes rapid  
587 repair of DNA damage in the polyploid archaeon *Haloferax volcanii* by restraining  
588 homologous recombination. *PLoS Genet* **5**, e1000552,  
589 doi:10.1371/journal.pgen.1000552 (2009).

590 41 Grogan, D. W. Understanding DNA Repair in Hyperthermophilic Archaea: Persistent  
591 Gaps and Other Reasons to Focus on the Fork. *Archaea* **2015**, 942605,  
592 doi:10.1155/2015/942605 (2015).

593 42 Korkhin, Y. *et al.* Evolution of complex RNA polymerases: the complete archaeal  
594 RNA polymerase structure. *PLoS Biol* **7**, e1000102,  
595 doi:10.1371/journal.pbio.1000102 (2009).

596 43 Koonin, E. V., Makarova, K. S. & Elkins, J. G. Orthologs of the small RPB8 subunit  
597 of the eukaryotic RNA polymerases are conserved in hyperthermophilic  
598 Crenarchaeota and "Korarchaeota". *Biol Direct* **2**, 38, doi:10.1186/1745-6150-2-38  
599 (2007).

600 44 Wojtas, M. N., Mogni, M., Millet, O., Bell, S. D. & Abrescia, N. G. Structural and  
601 functional analyses of the interaction of archaeal RNA polymerase with DNA.  
602 *Nucleic Acids Res* **40**, 9941-9952, doi:10.1093/nar/gks692 (2012).

603 45 Iqbal, J. & Qureshi, S. A. Selective depletion of *Sulfolobus solfataricus* transcription  
604 factor E under heat shock conditions. *J Bacteriol* **192**, 2887-2891,  
605 doi:10.1128/JB.01534-09 (2010).

606 46 Rauch, B. Functional analysis of multiple general transcription factors in *Sulfolobus*  
607 *acidocaldarius*. *PhD Thesis* (2013).

608 47 Qureshi, S. A., Bell, S. D. & Jackson, S. P. Factor requirements for transcription in  
609 the Archaeon *Sulfolobus shibatae*. *EMBO J* **16**, 2927-2936,  
610 doi:10.1093/emboj/16.10.2927 (1997).

611 48 Lundgren, M. & Bernander, R. Genome-wide transcription map of an archaeal cell  
612 cycle. *Proc Natl Acad Sci U S A* **104**, 2939-2944, doi:10.1073/pnas.0611333104  
613 (2007).

614 49 Gotz, D. *et al.* Responses of hyperthermophilic crenarchaea to UV irradiation.  
615 *Genome Biol* **8**, R220, doi:10.1186/gb-2007-8-10-r220 (2007).

616 50 Frols, S. *et al.* Response of the hyperthermophilic archaeon *Sulfolobus solfataricus* to  
617 UV damage. *J Bacteriol* **189**, 8708-8718, doi:10.1128/JB.01016-07 (2007).

618 51 Feng, X., Sun, M., Han, W., Liang, Y. X. & She, Q. A transcriptional factor B  
619 paralog functions as an activator to DNA damage-responsive expression in archaea.  
620 *Nucleic Acids Res*, doi:10.1093/nar/gky236 (2018).

621 52 Schult, F. *et al.* Effect of UV irradiation on *Sulfolobus acidocaldarius* and  
622 involvement of the general transcription factor TFB3 in the early UV response.  
623 *Nucleic Acids Res*, doi:10.1093/nar/gky527 (2018).

624 53 Blombach, F. *et al.* Archaeal TFEalpha/beta is a hybrid of TFIIE and the RNA  
625 polymerase III subcomplex hRPC62/39. *Elife* **4**, e08378, doi:10.7554/eLife.08378  
626 (2015).

627 54 Daniels, J. P., Kelly, S., Wickstead, B. & Gull, K. Identification of a crenarchaeal  
628 orthologue of Elf1: implications for chromatin and transcription in Archaea. *Biol*  
629 *Direct* **4**, 24, doi:10.1186/1745-6150-4-24 (2009).

630 55 Fouqueau, T. *et al.* The transcript cleavage factor paralogue TFS4 is a potent RNA  
631 polymerase inhibitor. *Nat Commun* **8**, 1914, doi:10.1038/s41467-017-02081-3  
632 (2017).

633 56 Fischer, S. *et al.* The archaeal Lsm protein binds to small RNAs. *J Biol Chem* **285**,  
634 34429-34438, doi:10.1074/jbc.M110.118950 (2010).

635 57 Martens, B. *et al.* The Heptameric SmAP1 and SmAP2 Proteins of the Crenarchaeon  
636 *Sulfolobus Solfataricus* Bind to Common and Distinct RNA Targets. *Life (Basel)* **5**,  
637 1264-1281, doi:10.3390/life5021264 (2015).

638 58 Martens, B. *et al.* The SmAP1/2 proteins of the crenarchaeon *Sulfolobus solfataricus*  
639 interact with the exosome and stimulate A-rich tailing of transcripts. *Nucleic Acids*  
640 *Res* **45**, 7938-7949, doi:10.1093/nar/gkx437 (2017).

641 59 Gangwani, L., Mikrut, M., Theroux, S., Sharma, M. & Davis, R. J. Spinal muscular  
642 atrophy disrupts the interaction of ZPR1 with the SMN protein. *Nat Cell Biol* **3**, 376-  
643 383, doi:10.1038/35070059 (2001).

644 60 Gangwani, L., Flavell, R. A. & Davis, R. J. ZPR1 is essential for survival and is  
645 required for localization of the survival motor neurons (SMN) protein to Cajal bodies.  
646 *Mol Cell Biol* **25**, 2744-2756, doi:10.1128/MCB.25.7.2744-2756.2005 (2005).

647 61 Gangwani, L. Deficiency of the zinc finger protein ZPR1 causes defects in  
648 transcription and cell cycle progression. *J Biol Chem* **281**, 40330-40340,  
649 doi:10.1074/jbc.M608165200 (2006).

650 62 Ahel, I., Korencic, D., Ibba, M. & Soll, D. Trans-editing of mischarged tRNAs. *Proc*  
651 *Natl Acad Sci U S A* **100**, 15422-15427, doi:10.1073/pnas.2136934100 (2003).

652 63 Tumbula, D. *et al.* Archaeal aminoacyl-tRNA synthesis: diversity replaces dogma.  
653 *Genetics* **152**, 1269-1276 (1999).

654 64 Tumbula, D. L., Becker, H. D., Chang, W. Z. & Soll, D. Domain-specific recruitment  
655 of amide amino acids for protein synthesis. *Nature* **407**, 106-110,  
656 doi:10.1038/35024120 (2000).

657 65 Sheppard, K. & Soll, D. On the evolution of the tRNA-dependent amidotransferases,  
658 GatCAB and GatDE. *J Mol Biol* **377**, 831-844, doi:10.1016/j.jmb.2008.01.016  
659 (2008).

660 66 Atkinson, G. C., Hauryliuk, V. & Tenson, T. An ancient family of SelB elongation  
661 factor-like proteins with a broad but disjunct distribution across archaea. *BMC Evol*  
662 *Biol* **11**, 22, doi:10.1186/1471-2148-11-22 (2011).

663 67 Lindas, A. C., Karlsson, E. A., Lindgren, M. T., Etema, T. J. & Bernander, R. A  
664 unique cell division machinery in the Archaea. *Proc Natl Acad Sci U S A* **105**, 18942-  
665 18946, doi:10.1073/pnas.0809467105 (2008).

666 68 Samson, R. Y., Obita, T., Freund, S. M., Williams, R. L. & Bell, S. D. A role for the  
667 ESCRT system in cell division in archaea. *Science* **322**, 1710-1713,  
668 doi:10.1126/science.1165322 (2008).

669 69 Yang, N. & Driessen, A. J. Deletion of *cdvB* paralogous genes of *Sulfolobus*  
670 *acidocaldarius* impairs cell division. *Extremophiles* **18**, 331-339, doi:10.1007/s00792-  
671 013-0618-5 (2014).

672 70 Liu, J. *et al.* Functional assignment of multiple ESCRT-III homologs in cell division  
673 and budding in *Sulfolobus islandicus*. *Mol Microbiol* **105**, 540-553,  
674 doi:10.1111/mmi.13716 (2017).

675 71 Zhang, C. & Whitaker, R. J. Microhomology-Mediated High-Throughput Gene  
676 Inactivation Strategy for the Hyperthermophilic Crenarchaeon *Sulfolobus islandicus*.  
677 *Appl Environ Microbiol* **84**, doi:10.1128/AEM.02167-17 (2018).

678 72 Kalliomaa-Sanford, A. K. *et al.* Chromosome segregation in Archaea mediated by a  
679 hybrid DNA partition machine. *Proc Natl Acad Sci U S A* **109**, 3754-3759,  
680 doi:10.1073/pnas.1113384109 (2012).

681 73 Snijders, A. P. *et al.* Reconstruction of central carbon metabolism in *Sulfolobus*  
682 *solfataricus* using a two-dimensional gel electrophoresis map, stable isotope labelling  
683 and DNA microarray analysis. *Proteomics* **6**, 1518-1529,  
684 doi:10.1002/pmic.200402070 (2006).

685 74 Ulas, T., Riemer, S. A., Zaparty, M., Siebers, B. & Schomburg, D. Genome-scale  
686 reconstruction and analysis of the metabolic network in the hyperthermophilic  
687 archaeon *Sulfolobus solfataricus*. *PLoS One* **7**, e43401,  
688 doi:10.1371/journal.pone.0043401 (2012).

689 75 Yan, Z., Maruyama, A., Arakawa, T., Fushinobu, S. & Wakagi, T. Crystal structures  
690 of archaeal 2-oxoacid:ferredoxin oxidoreductases from *Sulfolobus tokodaii*. *Sci Rep*  
691 **6**, 33061, doi:10.1038/srep33061 (2016).

692 76 Samson, R. Y. *et al.* Specificity and function of archaeal DNA replication initiator  
693 proteins. *Cell Rep* **3**, 485-496, doi:10.1016/j.celrep.2013.01.002 (2013).

694 77 Liang, P. J. *et al.* Knockouts of RecA-like proteins RadC1 and RadC2 have distinct  
695 responses to DNA damage agents in *Sulfolobus islandicus*. *J Genet Genomics* **40**,  
696 533-542, doi:10.1016/j.jgg.2013.05.004 (2013).

697 78 Huang, Q. *et al.* Genetic analysis of the Holliday junction resolvases Hje and Hjc in  
698 *Sulfolobus islandicus*. *Extremophiles* **19**, 505-514, doi:10.1007/s00792-015-0734-5  
699 (2015).

700 79 Chu, Y. *et al.* aKMT Catalyzes Extensive Protein Lysine Methylation in the  
701 Hyperthermophilic Archaeon *Sulfolobus islandicus* but is Dispensable for the Growth  
702 of the Organism. *Mol Cell Proteomics* **15**, 2908-2923,  
703 doi:10.1074/mcp.M115.057778 (2016).

704 80 Li, X. *et al.* Deletion of the topoisomerase III gene in the hyperthermophilic archaeon  
705 *Sulfolobus islandicus* results in slow growth and defects in cell cycle control. *J Genet*  
706 *Genomics* **38**, 253-259, doi:10.1016/j.jgg.2011.05.001 (2011).

707 81 Zhang, C., Cooper, T. E., Krause, D. J. & Whitaker, R. J. Augmenting the genetic  
708 toolbox for *Sulfolobus islandicus* with a stringent positive selectable marker for  
709 agmatine prototrophy. *Appl Environ Microbiol* **79**, 5539-5549,  
710 doi:10.1128/AEM.01608-13 (2013).

711 82 Zhang, C. & Whitaker, R. J. A broadly applicable gene knockout system for the  
712 thermoacidophilic archaeon *Sulfolobus islandicus* based on simvastatin selection.  
713 *Microbiology* **158**, 1513-1522, doi:10.1099/mic.0.058289-0 (2012).

714 83 Zhang, C., She, Q., Bi, H. & Whitaker, R. J. The apt/6-Methylpurine  
715 Counterselection System and Its Applications in Genetic Studies of the  
716 Hyperthermophilic Archaeon *Sulfolobus islandicus*. *Appl Environ Microbiol* **82**,  
717 3070-3081, doi:10.1128/AEM.00455-16 (2016).

718 84 Bautista, M. A., Zhang, C. & Whitaker, R. J. Virus-induced dormancy in the  
719 archaeon *Sulfolobus islandicus*. *MBio* **6**, doi:10.1128/mBio.02565-14 (2015).

720 85 Peng, W. *et al.* Genetic determinants of PAM-dependent DNA targeting and pre-  
721 crRNA processing in *Sulfolobus islandicus*. *RNA Biol* **10**, 738-748,  
722 doi:10.4161/rna.23798 (2013).

723 86 Li, Y. *et al.* Harnessing Type I and Type III CRISPR-Cas systems for genome  
724 editing. *Nucleic Acids Res* **44**, e34, doi:10.1093/nar/gkv1044 (2016).

725 87 Liu, T. *et al.* Transcriptional regulator-mediated activation of adaptation genes  
726 triggers CRISPR de novo spacer acquisition. *Nucleic Acids Res* **43**, 1044-1055,  
727 doi:10.1093/nar/gku1383 (2015).

728 88 He, F., Vestergaard, G., Peng, W., She, Q. & Peng, X. CRISPR-Cas type I-A Cascade  
729 complex couples viral infection surveillance to host transcriptional regulation in the  
730 dependence of Csa3b. *Nucleic Acids Res* **45**, 1902-1913, doi:10.1093/nar/gkw1265  
731 (2017).

732 89 Deng, L., Kenchappa, C. S., Peng, X., She, Q. & Garrett, R. A. Modulation of  
733 CRISPR locus transcription by the repeat-binding protein Cbp1 in *Sulfolobus*.  
734 *Nucleic Acids Res* **40**, 2470-2480, doi:10.1093/nar/gkr1111 (2012).

735 90 Zhai, B. *et al.* Structure and Function of a Novel ATPase that Interacts with Holliday  
736 Junction Resolvase Hjc and Promotes Branch Migration. *J Mol Biol* **429**, 1009-1029,  
737 doi:10.1016/j.jmb.2017.02.016 (2017).

738 91 Song, X., Huang, Q., Ni, J., Yu, Y. & Shen, Y. Knockout and functional analysis of  
739 two DExD/H-box family helicase genes in *Sulfolobus islandicus* REY15A.  
740 *Extremophiles* **20**, 537-546, doi:10.1007/s00792-016-0847-5 (2016).  
741 92 Puigbo, P., Wolf, Y. I. & Koonin, E. V. Search for a 'Tree of Life' in the thicket of the  
742 phylogenetic forest. *J Biol* **8**, 59, doi:10.1186/jbiol159 (2009).  
743 93 Harris, J. K., Kelley, S. T., Spiegelman, G. B. & Pace, N. R. The genetic core of the  
744 universal ancestor. *Genome Res* **13**, 407-412, doi:10.1101/gr.652803 (2003).  
745 94 Gil, R. *et al.* The genome sequence of *Blochmannia floridanus*: comparative analysis  
746 of reduced genomes. *Proc Natl Acad Sci U S A* **100**, 9388-9393,  
747 doi:10.1073/pnas.1533499100 (2003).  
748 95 Weiss, M. C. *et al.* The physiology and habitat of the last universal common ancestor.  
749 *Nat Microbiol* **1**, 16116, doi:10.1038/nmicrobiol.2016.116 (2016).  
750 96 Wolf, Y. I., Makarova, K. S., Yutin, N. & Koonin, E. V. Updated clusters of  
751 orthologous genes for Archaea: a complex ancestor of the Archaea and the byways of  
752 horizontal gene transfer. *Biol Direct* **7**, 46, doi:10.1186/1745-6150-7-46 (2012).  
753 97 Guy, L. & Ettema, T. J. The archaeal 'TACK' superphylum and the origin of  
754 eukaryotes. *Trends Microbiol* **19**, 580-587, doi:10.1016/j.tim.2011.09.002 (2011).  
755 98 Raymann, K., Brochier-Armanet, C. & Gribaldo, S. The two-domain tree of life is  
756 linked to a new root for the Archaea. *Proc Natl Acad Sci U S A* **112**, 6670-6675,  
757 doi:10.1073/pnas.1420858112 (2015).  
758 99 Eme, L., Spang, A., Lombard, J., Stairs, C. W. & Ettema, T. J. G. Archaea and the  
759 origin of eukaryotes. *Nat Rev Microbiol* **15**, 711-723, doi:10.1038/nrmicro.2017.133  
760 (2017).  
761 100 Makarova, K. S., Yutin, N., Bell, S. D. & Koonin, E. V. Evolution of diverse cell  
762 division and vesicle formation systems in Archaea. *Nat Rev Microbiol* **8**, 731-741,  
763 doi:10.1038/nrmicro2406 (2010).  
764 101 Yutin, N., Puigbo, P., Koonin, E. V. & Wolf, Y. I. Phylogenomics of prokaryotic  
765 ribosomal proteins. *PLoS One* **7**, e36972, doi:10.1371/journal.pone.0036972 (2012).  
766 102 Mirkin, B. G., Fenner, T. I., Galperin, M. Y. & Koonin, E. V. Algorithms for  
767 computing parsimonious evolutionary scenarios for genome evolution, the last  
768 universal common ancestor and dominance of horizontal gene transfer in the  
769 evolution of prokaryotes. *BMC Evol Biol* **3**, 2 (2003).  
770 103 Makarova, K. S., Wolf, Y. I. & Koonin, E. V. Archaeal Clusters of Orthologous  
771 Genes (arCOGs): An Update and Application for Analysis of Shared Features  
772 between Thermococcales, Methanococcales, and Methanobacteriales. *Life (Basel)* **5**,  
773 818-840, doi:10.3390/life5010818 (2015).  
774 104 Reno, M. L., Held, N. L., Fields, C. J., Burke, P. V. & Whitaker, R. J. Biogeography  
775 of the *Sulfolobus islandicus* pan-genome. *Proc Natl Acad Sci U S A* **106**, 8605-8610,  
776 doi:10.1073/pnas.0808945106 (2009).  
777 105 Zhang, C. & Whitaker, R. J. Microhomology Mediated High-throughput Gene  
778 Inactivation Strategy for Hyperthermophilic Crenarchaeon *Sulfolobus islandicus*.  
779 *Appl Environ Microbiol*, doi:10.1128/AEM.02167-17 (2017).  
780 106 Peng, N. *et al.* A synthetic arabinose-inducible promoter confers high levels of  
781 recombinant protein expression in hyperthermophilic archaeon *Sulfolobus islandicus*.  
782 *Appl Environ Microbiol* **78**, 5630-5637, doi:10.1128/AEM.00855-12 (2012).  
783 107 Peyfoon, E. *et al.* The S-layer glycoprotein of the crenarchaeote *Sulfolobus*  
784 *acidocaldarius* is glycosylated at multiple sites with chitobiose-linked N  
785 glycans. *Archaea* **2010**, doi:10.1155/2010/754101 (2010).  
786 108 Crooks, G. E., Hon, G., Chandonia, J. M. & Brenner, S. E. WebLogo: a sequence  
787 logo generator. *Genome Res* **14**, 1188-1190, doi:10.1101/gr.849004 (2004).  
788

# Supplementary Figures and Legends

**a**

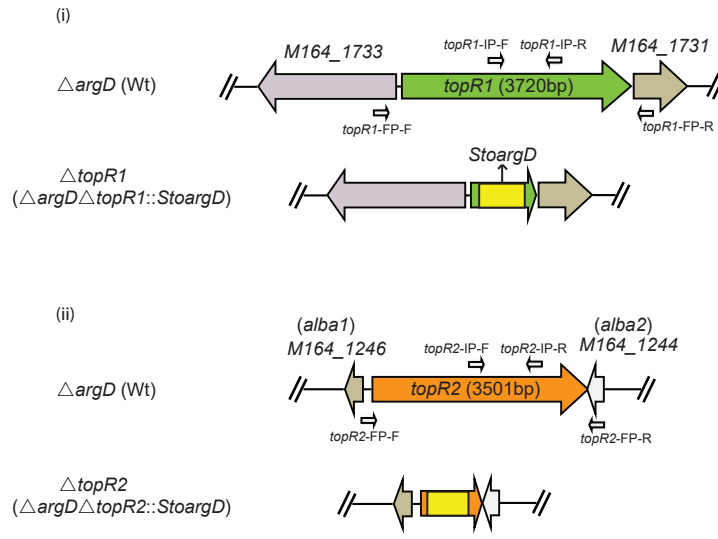

**b**

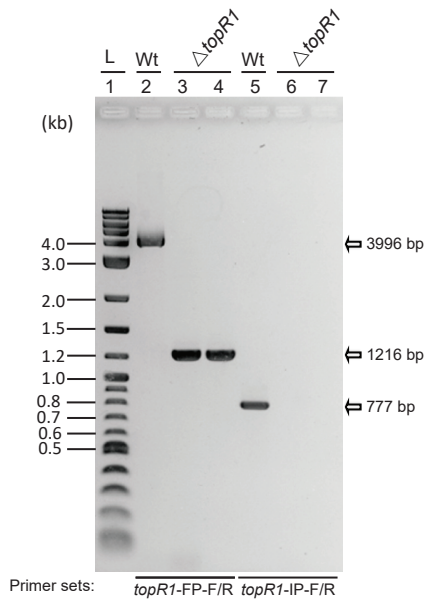

**c**

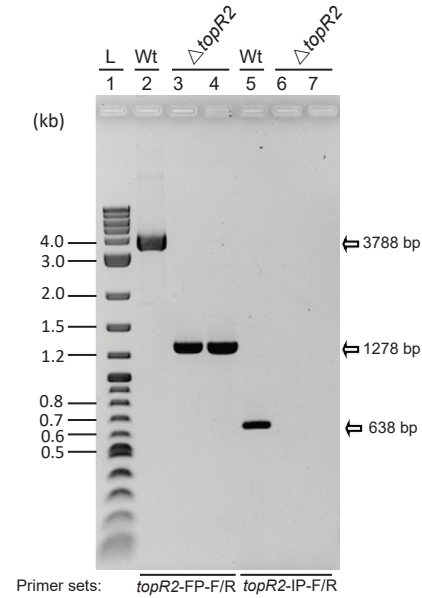

**Supplementary Figure 1: Confirmation of genotypes of reverse gyrase disruption mutants.** **a**, Genomic context of *topR1* and *topR2* in the genetic host (Wt) and mutant strains. **b**, PCR verification of  $\Delta topR1$  mutant strain. **c**, PCR verification of  $\Delta topR2$  mutant strain. L indicates 2-Log DNA Ladder (NEB, USA) and sizes of DNA bands are labelled.



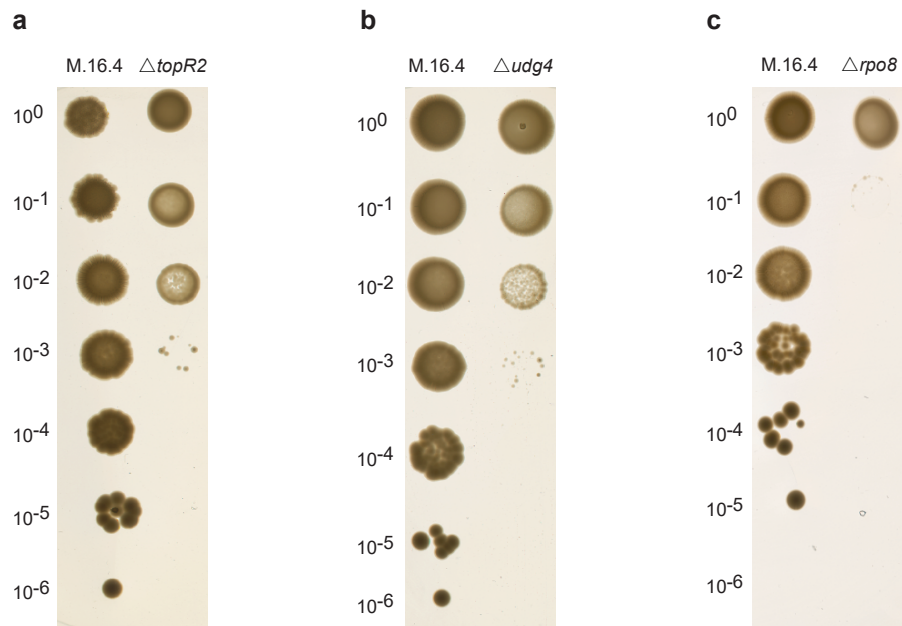

**Supplementary Figure 2: Disruption of *topR2*, *udg4*, and *rpo8* reduced cell viability.** The *S. islandicus* M.16.4 (agmatine prototrophy),  $\Delta topR2$  ( $\Delta argD\Delta topR2::StoargD$ ),  $\Delta udg4$  ( $\Delta argD\Delta udg4::StoargD$ ), and  $\Delta rpo8$  ( $\Delta argD\Delta rpo8::StoargD$ ) strains were grown in DY liquid medium at 76 °C. Cell cultures at the mid-log phase were normalized to OD<sub>600</sub>=0.5, and then serially diluted ten fold with 1× DY. Ten microliter of diluted cells were spotted on DY plates and then incubated at 76°C for 12 days. The resulting spots are imaged using an EPSON scanner.

**a**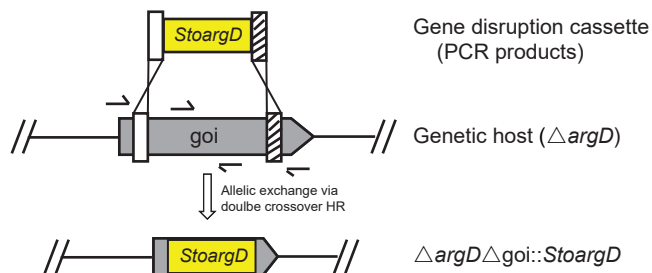

□ 35-40 bp microhomology (upstream) ▨ 35-40 bp microhomology (downstream) goi: gene of interest

*StoargD*: arginine decarboxylase expression cassette derived from *S. tokodaii*

**b**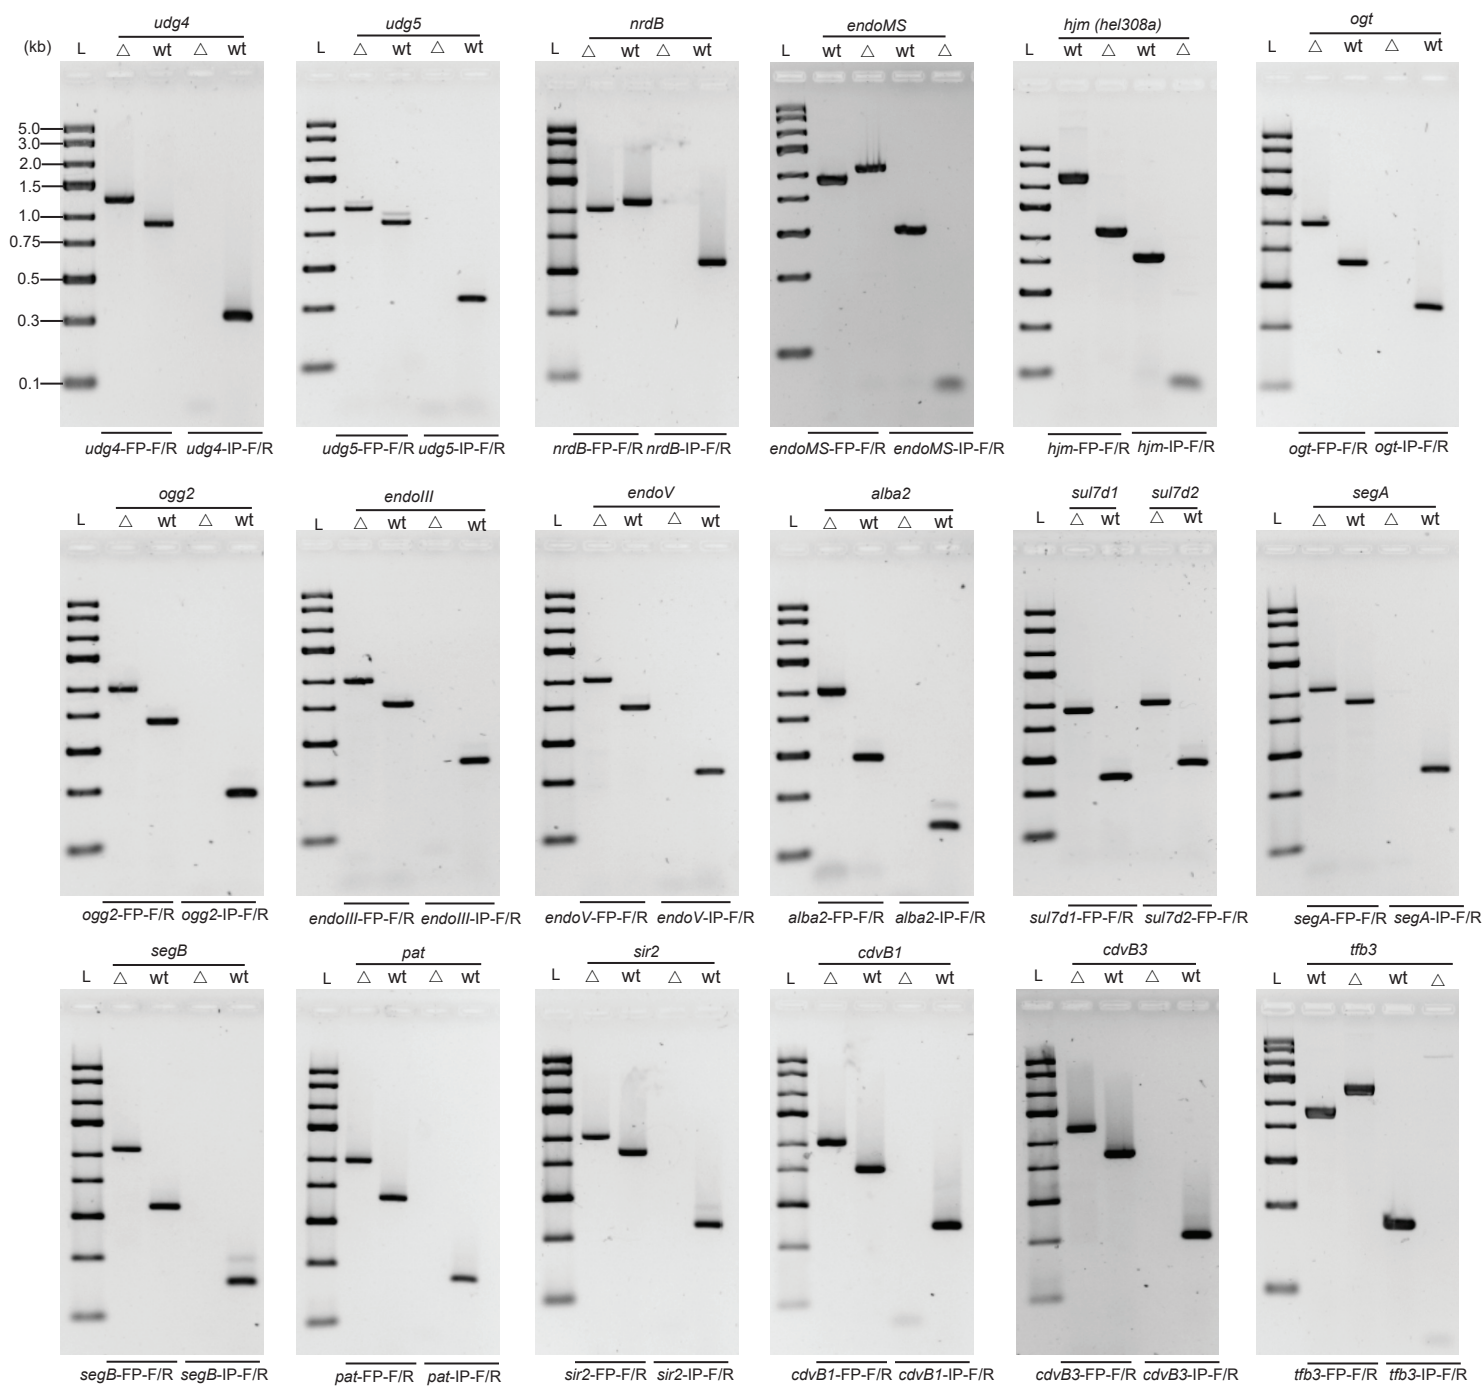

**b (Continued)**

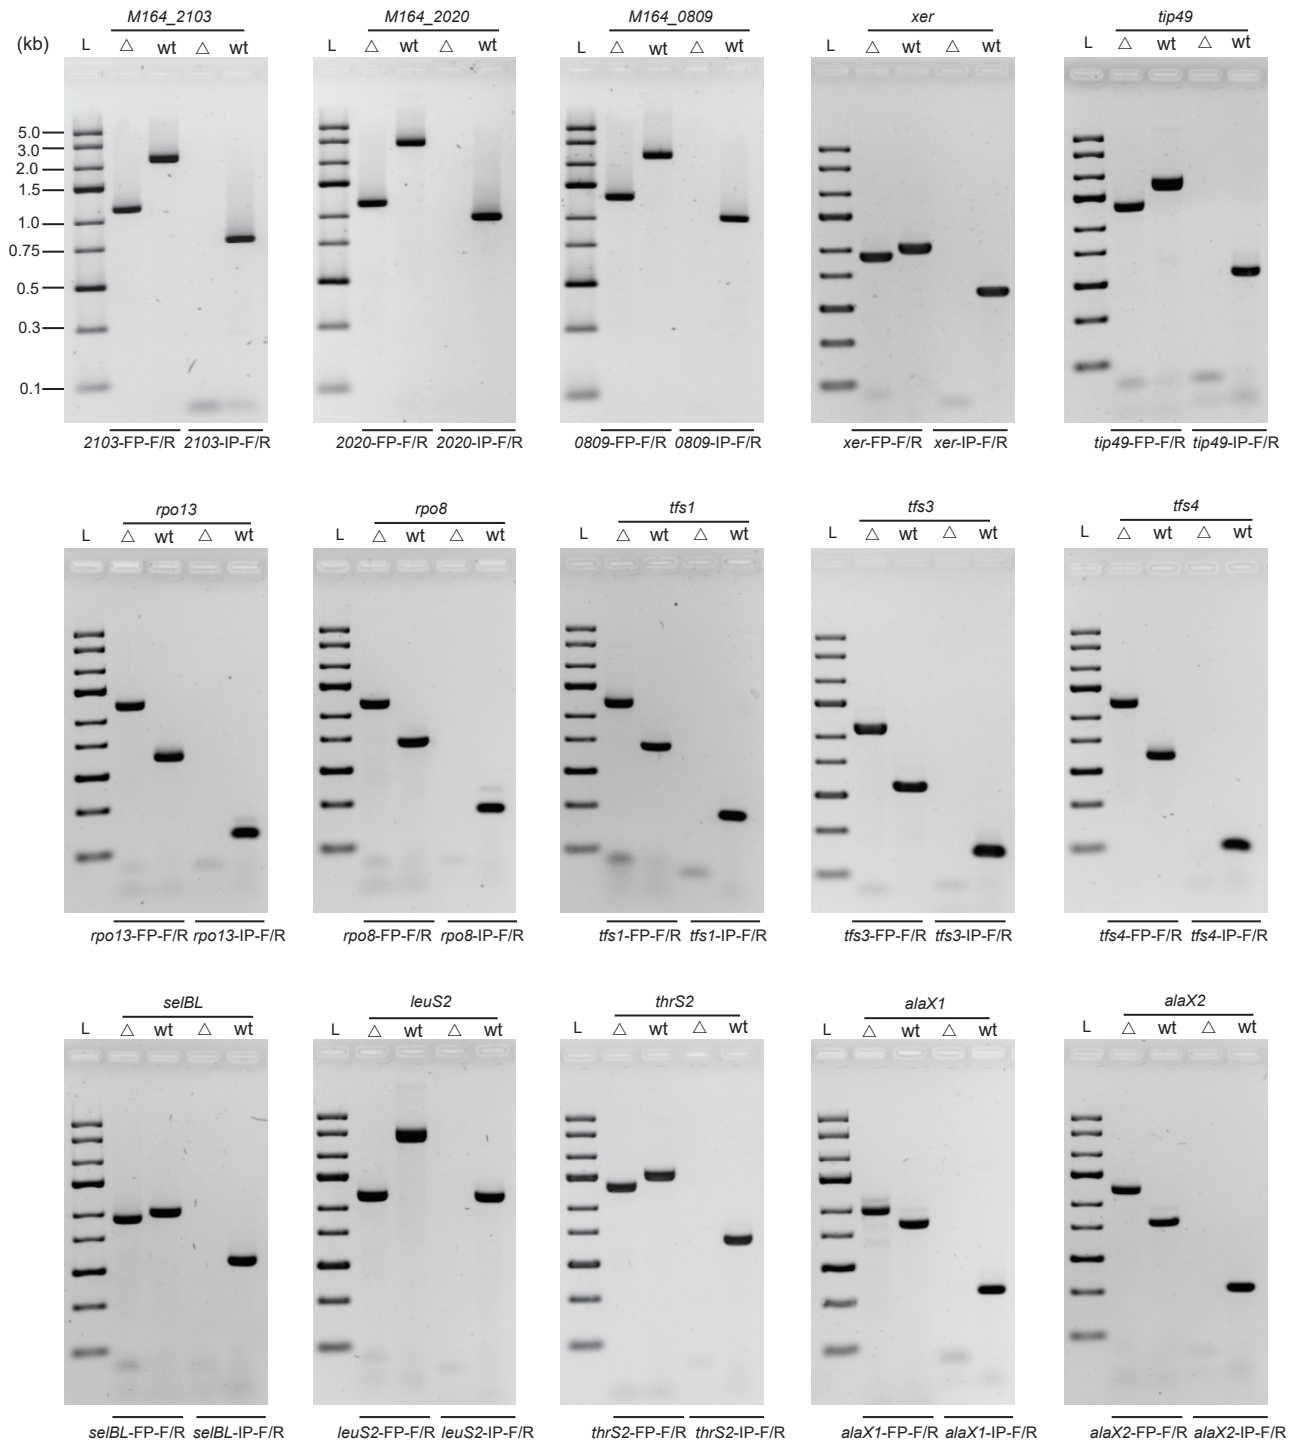

**Supplementary Figure 3: Verification of selected non-essential genes via a microhomology-mediated gene inactivation approach (MMGI) in *S. islandicus*<sup>105</sup>.** a, Schematic illustration of the MMGI. The gene disruption cassette, consisting of the *StoargD* marker flanked by 35-40 bp of microhomology that corresponded to flanking sequences of the targeted region, was transformed into an ArgD<sup>-</sup> strain, yielding ArgD<sup>+</sup> colonies via a double-crossover HR event. b, Confirmation of *S. islandicus* gene disruptions (Related to Supplementary Table 3 and Dataset 10) by PCR analyses of target gene locus. A flanking primer set (-FP-F/R) annealing to upstream and downstream sequences of the HR regions of *goi*, and an internal primer set (-IP-F/R) specifically binding to the coding region of *goi*, were used to confirm the gene disruptions. L indicates the GeneRuler Express DNA Ladder (Thermo Fisher, USA) and the marker sizes are labelled. The wt and Δ denotes the parental strain and mutant strain respectively. The expected sizes of amplicons are shown in Supplementary Table 8.



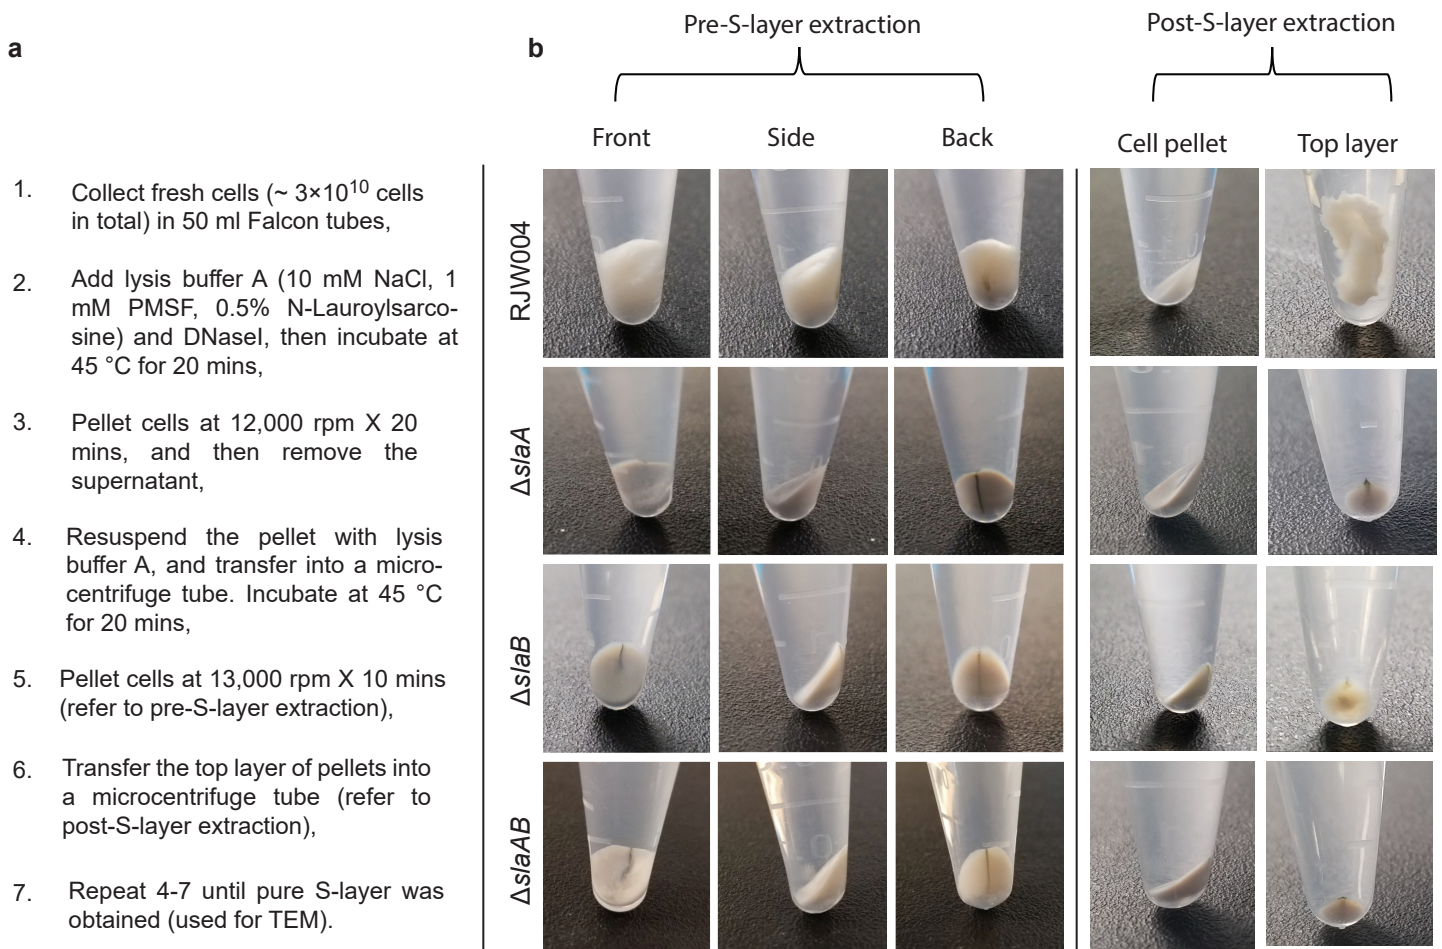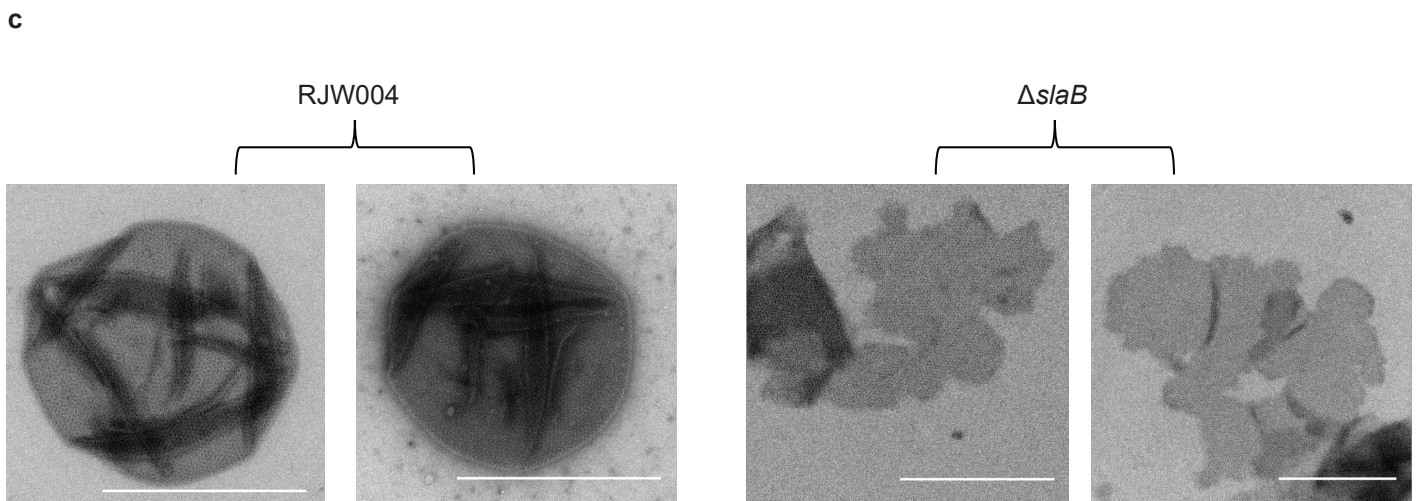

**Supplementary Figure 4: Extraction and TEM analysis of S-layer from the wild type (RWJ004) and S-layer gene knockout strains.** **a**, A flowchart illustrating the S-layer extraction procedure, as described previously with minor changes<sup>107</sup>. **b**, Extraction of S-layer from the wild type and S-layer gene knockout strains. A clear whitish layer can be observed and separated from the pellet in the wild type and  $\Delta slaB$  mutant cells, whereas no whitish layer was observed in  $\Delta slaA$  and  $\Delta slaAB$  mutant cells. The whitish layer (S-layer) extracted from the wild type was more abundant than that from the  $\Delta slaB$  mutant cells. These experiments were biologically repeated 3 times and the same phenomenon was observed. **c**, TEM analysis of the negatively stained extracted S-layer (10  $\mu$ l of MilliQ water-dissolved S-layer) from the wild type and  $\Delta slaB$  mutant cells. Scale bars, 1  $\mu$ m.

**a**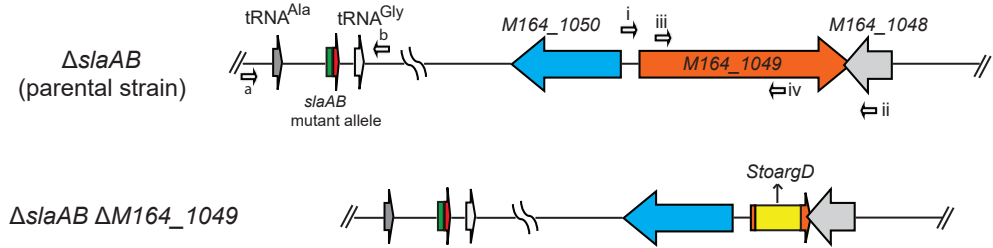**b**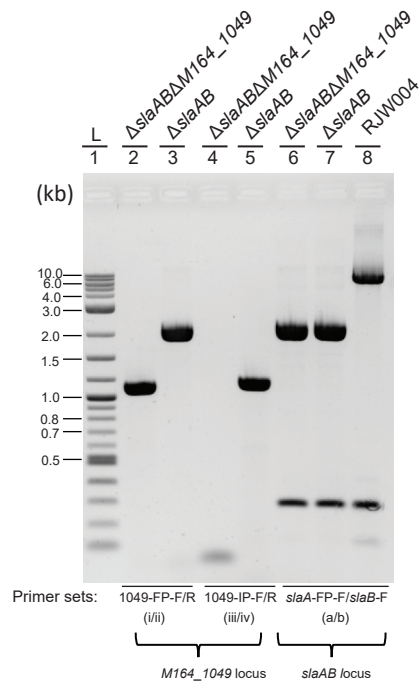

**Supplementary Figure 5: Confirmation of the  $\Delta slaAB \Delta M164_1049$  mutant genotype.** **a**, Genomic context of *M164\_1049* in the parental and mutant strains. *M164\_1049* was replaced with the selectable marker *StoargD* in the genetic background of the  $\Delta slaAB$  mutant via homologous recombination. **b**, PCR verification of the  $\Delta slaAB \Delta M164_1049$  mutant strain. The *M164\_1049* and *slaAB* loci in the  $\Delta slaAB \Delta M164_1049$  mutant strain were examined using three primer sets, the relative positions of which are shown with small arrows in **a**. The *S. islandicus* strain RJW004, a genetic host to generate the  $\Delta slaAB$  deletion mutant, is used as a control (lane 8) in PCR analysis when checking the *slaAB* mutant allele in the  $\Delta slaAB \Delta M164_1049$  mutant strain. L indicates the 2-Log DNA Ladder (NEB, USA), and the marker size corresponding to each band is labelled. Expected sizes of amplicons can be found in Supplementary Table 8.

a

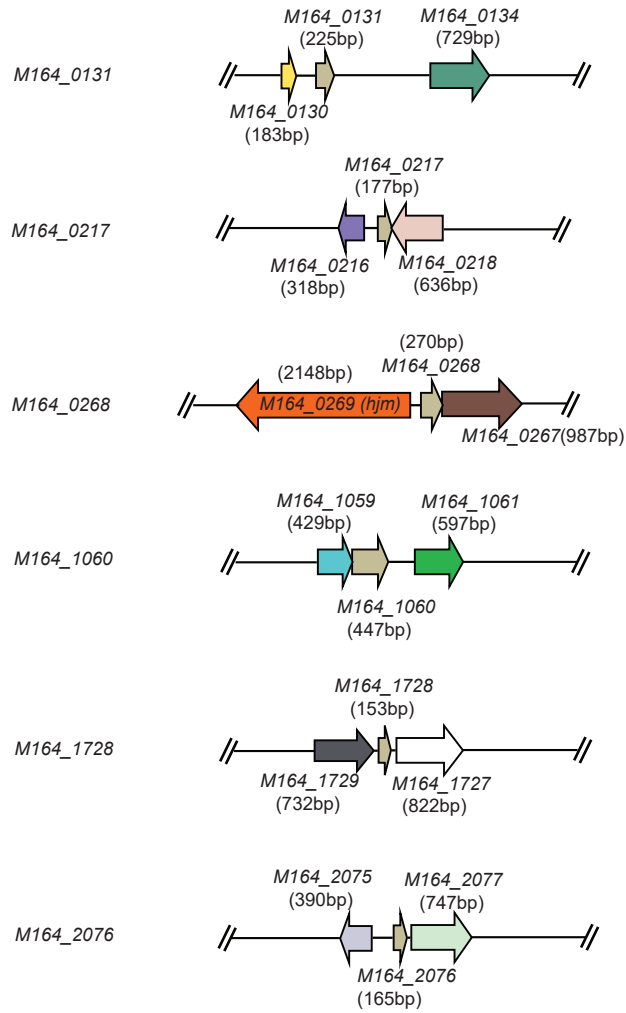

b

| Locus_tag | Function                                                  | log <sub>2</sub> FC | EI | Essential? |
|-----------|-----------------------------------------------------------|---------------------|----|------------|
| M164_0130 | Uncharacterized membrane protein                          | -1.50               | 8  | No         |
| M164_0134 | ATPase involved in chromosome partitioning, ParA family   | -2.84               | 9  | No         |
| M164_0216 | Transcriptional regulator, contains N-terminal RHH domain | 1.42                | 7  | No         |
| M164_0218 | Zn-dependent hydrolase of the beta-lactamase fold         | -2.08               | 10 | No         |
| M164_0267 | Phosphate/sulphate permease                               | 0.13                | 26 | No         |
| M164_0269 | Replicative superfamily II helicase                       | -0.89               | 8  | No         |
| M164_1059 | HEPN domain containing protein                            | -1.17               | 5  | No         |
| M164_1061 | HAD superfamily hydrolase                                 | 1.86                | 19 | No         |
| M164_1727 | tRNA(1-methyladenosine) methyltransferase                 | 1.33                | 20 | No         |
| M164_1729 | Sugar-specific transcriptional regulator TrmB             | -9.84               | 0  | Yes        |
| M164_2075 | Transcriptional regulator, contains HTH domain            | -8.95               | 0  | Yes        |
| M164_2077 | Mg-dependent DNase                                        | -0.13               | 10 | No         |

**Supplementary Figure 6: Predicted essential antitoxin genes.** a, Genomic context of the essential antitoxin genes in *S. islandicus* M.16.4. b, Essentiality/non-essentiality of genes adjacent to the essential antitoxin genes.

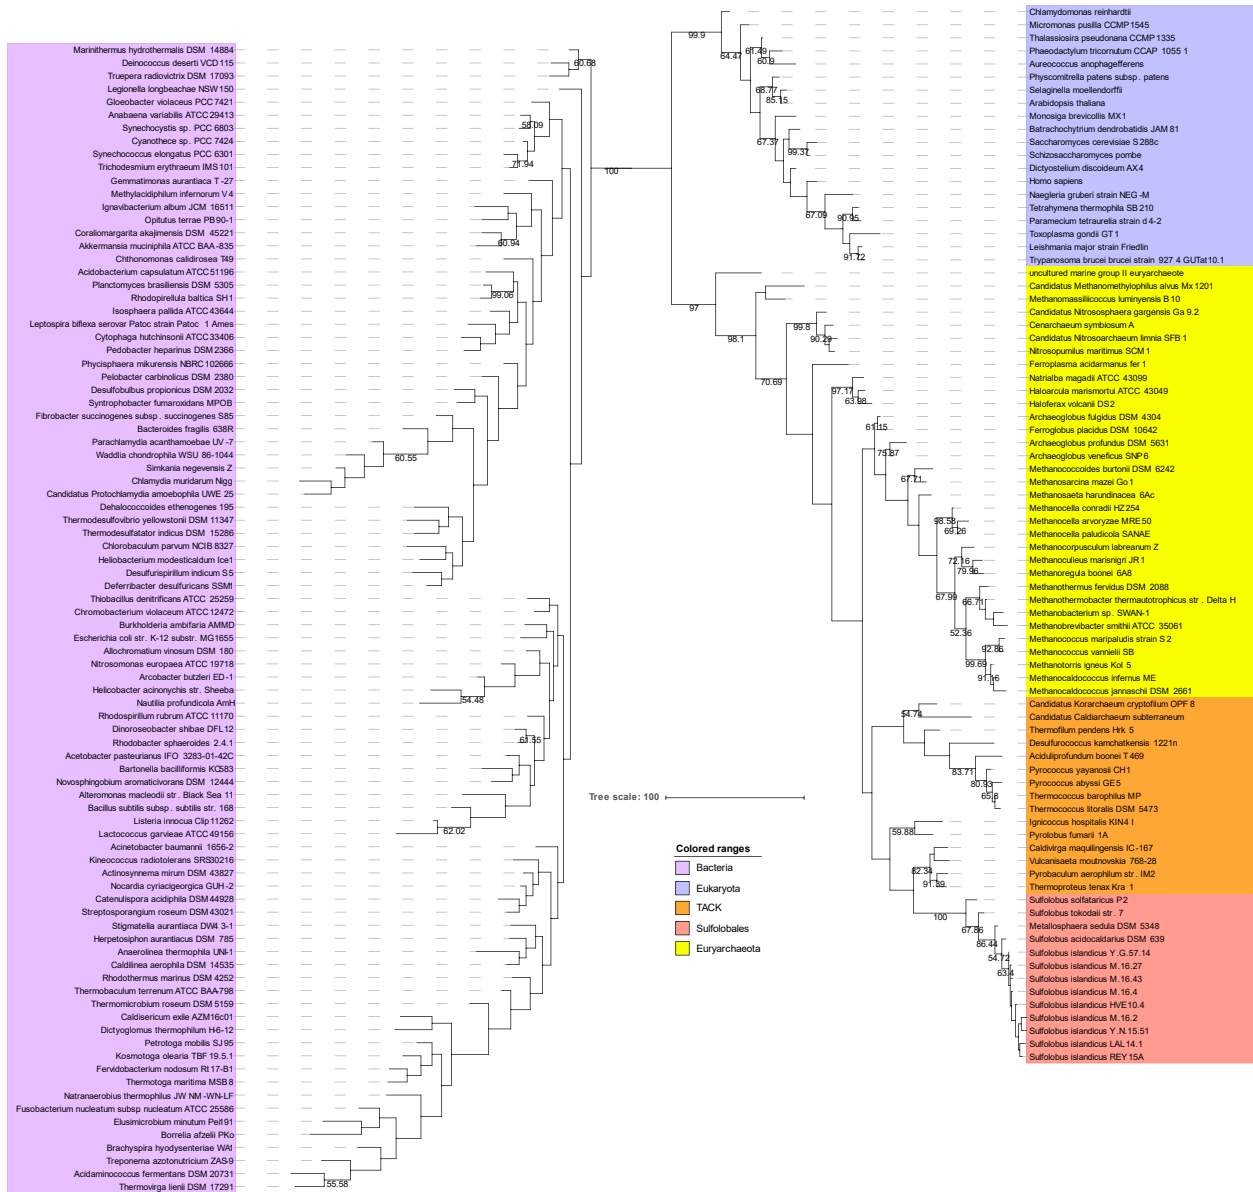

**Supplementary Figure 7: Maximum parsimony tree for eggNOG presence/absence patterns.** Bootstrap values are shown at nodes where they are greater than 50. Distance is shown in number of changes to the set of genes compared to *S. islandicus* M.16.4.

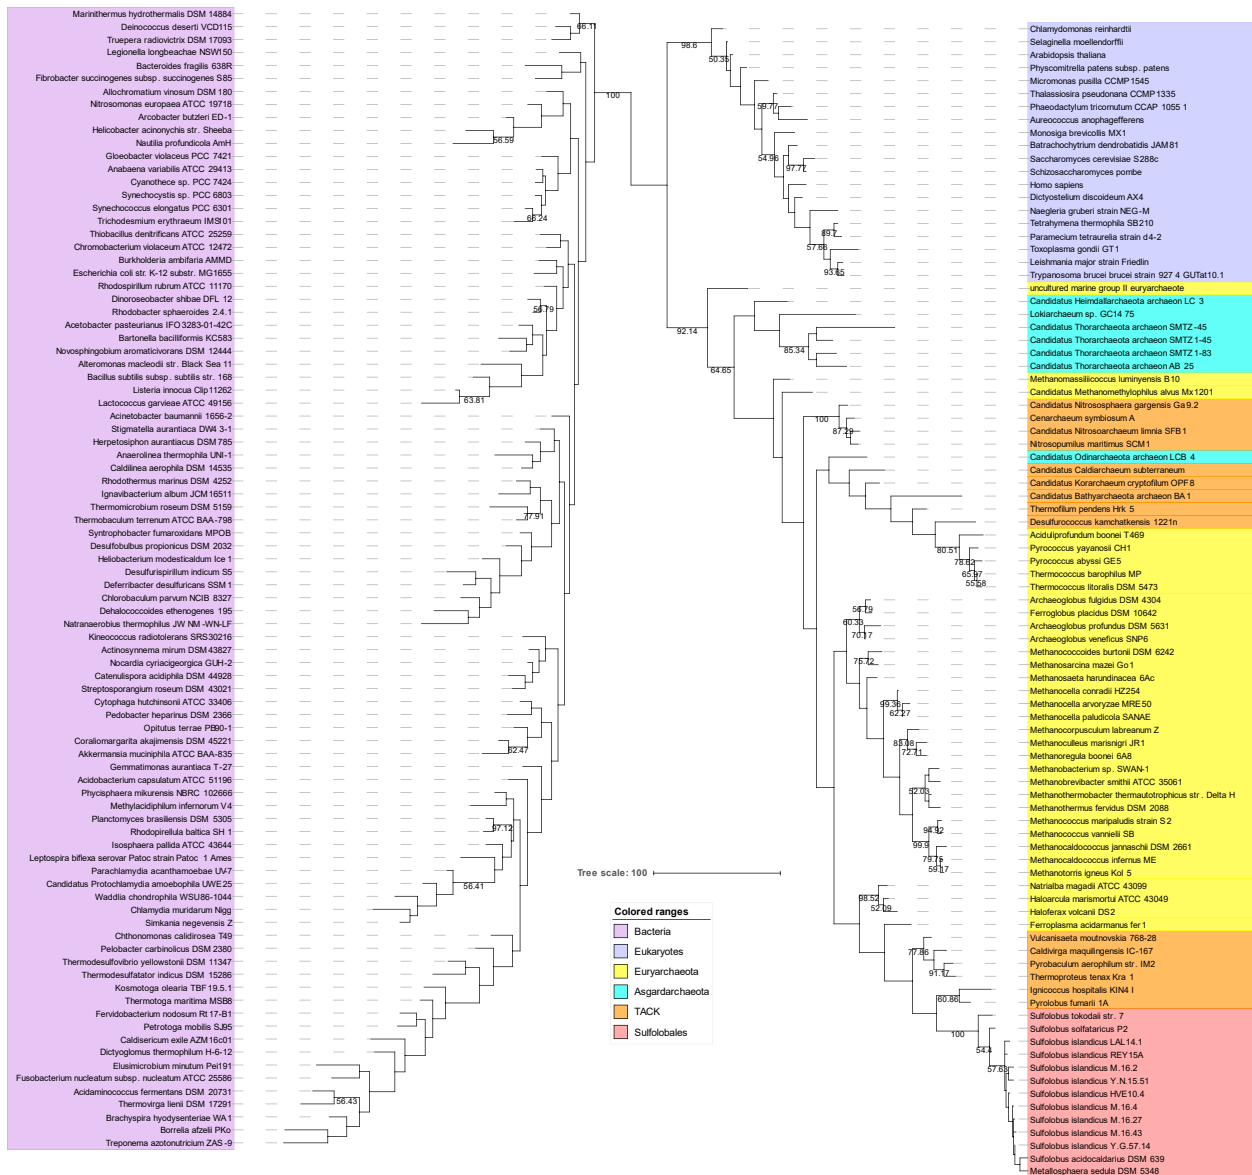

**Supplementary Figure 8: Maximum parsimony tree for eggNOG presence/absence patterns, including early Asgardarchaeota genomes.** Bootstrap values are shown at nodes where they are greater than 50. Distance is shown in number of changes to the set of genes compared to *S. islandicus* M.16.4.



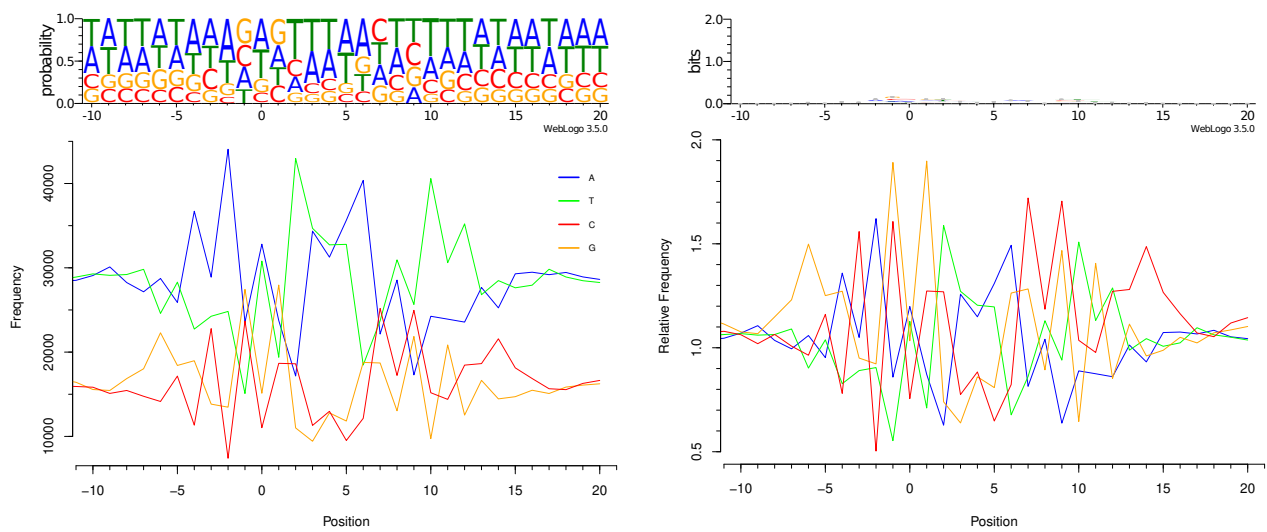

**Supplementary Figure 9: Nucleotide frequency near insertion sites shows weak sequence preference compared to random.** *Left*, Nucleotide frequency of sequence 10 base-pairs upstream and 20 base-pairs downstream of all insertion sites included in essential gene calculations in logo (top) and line-graph (bottom) forms. *Right*, bits of sequence information in logo form according to WebLogo<sup>108</sup> (top) and frequency relative to counts at an equal number of randomized locations in the genome (bottom).

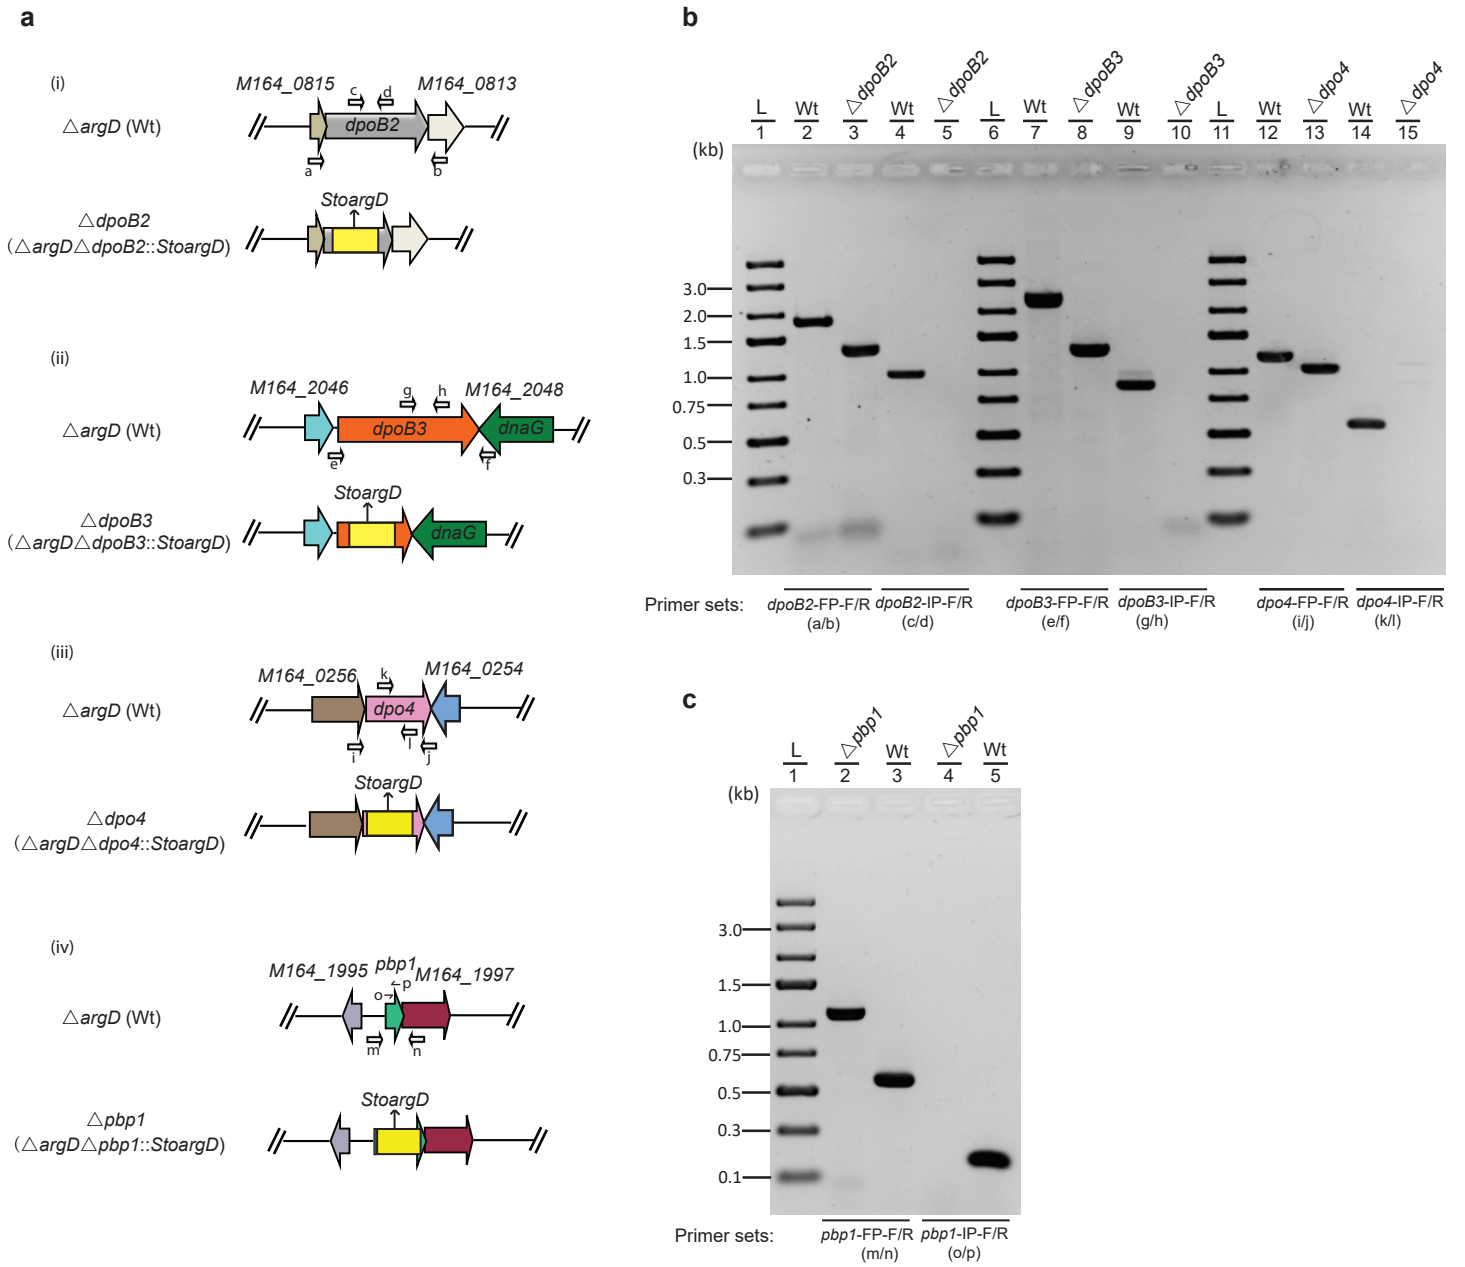

**Supplementary Figure 10: Confirmation of *dpoB2*, *dpoB3*, *dpo4*, and *pbp1* disruption mutant genotypes. a**, Genomic context of *dpoB2*, *dpoB3*, *dpo4*, and *pbp1* in the genetic host (Wt) and mutant strains. **b**, PCR verification of  $\Delta dpoB2$ ,  $\Delta dpoB3$ , and  $\Delta dpo4$  mutant strains. **c**, PCR verification of the  $\Delta pbp1$  mutant strain. L indicates the GeneRuler Express DNA Ladder (Thermo Fisher, USA) and the marker sizes are labelled. Expected sizes of amplicons can be found in Supplementary Table 8.
